# Supplementary material for: Age at death during the Covid-19 lockdown in French metropolitan regions: a non parametric quantile regression approach
Source: Springer Nature journal article supplement (doi:10.1186/s12889-024-18699-0), 2024-05-07
Supplement: MOESM1 [file 27065384]

## Additional file 1

Title: Age at death during the Covid-19 lockdown in French metropolitan regions: A non parametric quantile regression approach

Supplementary Table 1 Descriptive statistics of deaths by region

| Region                     | Number of deaths over the period | Average number of deaths per day over the period | Number of deaths during the lockdown | Average age at death over the period | Average age at death during the lockdown | Region population |
|----------------------------|----------------------------------|--------------------------------------------------|--------------------------------------|--------------------------------------|------------------------------------------|-------------------|
| Auvergne-Rhône-Alpes       | 643 440                          | 182.3                                            | 12 776                               | 78.7                                 | 81.2                                     | 8 078 652         |
| Bourgogne-Franche-Comté    | 280 626                          | 79.5                                             | 5917                                 | 79.0                                 | 81.4                                     | 2 801 695         |
| Bretagne                   | 328 240                          | 93.0                                             | 5457                                 | 78.5                                 | 79.9                                     | 3 373 835         |
| Centre-Val de Loire        | 244 097                          | 69.2                                             | 4654                                 | 79.3                                 | 81.4                                     | 2 574 863         |
| Grand-Est                  | 499 764                          | 141.6                                            | 12 781                               | 77.7                                 | 80.6                                     | 5 562 651         |
| Hauts-de-France            | 524 061                          | 148.5                                            | 10 524                               | 76.4                                 | 78.4                                     | 5 997 734         |
| Ile-de-France              | 719 086                          | 203.7                                            | 22 346                               | 76.2                                 | 79.7                                     | 12 271 794        |
| Normandie                  | 312 537                          | 88.5                                             | 5647                                 | 78.0                                 | 79.7                                     | 3 325 522         |
| Nouvelle Aquitaine         | 606 952                          | 171.9                                            | 9871                                 | 79.6                                 | 80.9                                     | 6 033 952         |
| Occitanie                  | 544 578                          | 154.3                                            | 9279                                 | 79.3                                 | 80.4                                     | 5 973 969         |
| Pays de la Loire           | 478 617                          | 135.6                                            | 8400                                 | 79.1                                 | 81.0                                     | 3 832 120         |
| Provence-Alpes-Côte d'Azur | 321 906                          | 91.2                                             | 5721                                 | 78.7                                 | 80.4                                     | 5 098 666         |

Study period: January 1<sup>st</sup>, 2011 to August 31<sup>st</sup>, 2020. Lockdown period: March 17<sup>th</sup> to May 11<sup>th</sup>, 2020.

Source of population data: Institut national de la statistique et des études économiques (Insee). Populations légales des régions en 2020 [Internet]. [cited 2024 Mar 4].

Available from: <https://www.insee.fr/fr/statistiques/6683011?sommaire=6683037>

**Supplementary Table 2** Observed frequencies of deaths by day, by region, by quantile, from January 2011 to August 2020 - Males

|                            | Quantiles |     |      |      |      |      |      |      |      |      |      |      |      |
|----------------------------|-----------|-----|------|------|------|------|------|------|------|------|------|------|------|
|                            | 1         | 5   | 10   | 20   | 30   | 40   | 50   | 60   | 70   | 80   | 90   | 95   | 99   |
| Auvergne-Rhône-Alpes       | 0.9       | 4.5 | 9.1  | 18.2 | 27.2 | 36.3 | 45.4 | 54.5 | 63.6 | 72.6 | 81.7 | 86.3 | 89.9 |
| Bourgogne-Franche-Comté    | 0.4       | 2.0 | 4.0  | 8.0  | 12.0 | 15.9 | 19.9 | 23.9 | 27.9 | 31.9 | 35.9 | 37.9 | 39.5 |
| Bretagne                   | 0.5       | 2.3 | 4.6  | 9.3  | 13.9 | 18.5 | 23.2 | 27.8 | 32.5 | 37.1 | 41.7 | 44.1 | 45.9 |
| Centre-Val de Loire        | 0.3       | 1.7 | 3.5  | 7.0  | 10.5 | 14.0 | 17.5 | 21.0 | 24.5 | 28.0 | 31.5 | 33.2 | 34.6 |
| Grand-Est                  | 0.7       | 3.5 | 7.0  | 14.1 | 21.1 | 28.2 | 35.2 | 42.2 | 49.3 | 56.3 | 63.3 | 66.9 | 69.7 |
| Hauts-de-France            | 0.7       | 3.7 | 7.5  | 14.9 | 22.4 | 29.8 | 37.3 | 44.7 | 52.2 | 59.7 | 67.1 | 70.8 | 73.8 |
| Ile-de-France              | 1.0       | 5.0 | 10.1 | 20.1 | 30.2 | 40.3 | 50.4 | 60.4 | 70.5 | 80.6 | 90.6 | 95.7 | 99.7 |
| Normandie                  | 0.9       | 4.3 | 8.6  | 17.2 | 25.8 | 34.4 | 43.1 | 51.7 | 60.3 | 68.9 | 77.5 | 81.8 | 85.2 |
| Nouvelle Aquitaine         | 0.4       | 2.2 | 4.5  | 8.9  | 13.4 | 17.8 | 22.3 | 26.7 | 31.2 | 35.7 | 40.1 | 42.3 | 44.1 |
| Occitanie                  | 0.8       | 3.9 | 7.7  | 15.5 | 23.2 | 31.0 | 38.7 | 46.5 | 54.2 | 62.0 | 69.7 | 73.6 | 76.7 |
| Pays de la Loire           | 0.7       | 3.4 | 6.7  | 13.4 | 20.1 | 26.9 | 33.6 | 40.3 | 47.0 | 53.7 | 60.4 | 63.8 | 66.5 |
| Provence-Alpes-Côte d'Azur | 0.5       | 2.3 | 4.6  | 9.3  | 13.9 | 18.5 | 23.1 | 27.8 | 32.4 | 37.0 | 41.7 | 44.0 | 45.8 |

*Interpretation: In Auvergne-Rhône-Alpes, the quantile 1 for age at death in males corresponds to 0.9 death per day on average during the whole period.*

**Supplementary Table 3** Observed frequencies of deaths by day, by region, by quantile, from January 2011 to August 2020 - Females

|                            | Quantiles |     |      |      |      |      |      |      |      |      |      |      |       |
|----------------------------|-----------|-----|------|------|------|------|------|------|------|------|------|------|-------|
|                            | 1         | 5   | 10   | 20   | 30   | 40   | 50   | 60   | 70   | 80   | 90   | 95   | 99    |
| Auvergne-Rhône-Alpes       | 0.9       | 4.6 | 9.1  | 18.3 | 27.4 | 36.6 | 45.7 | 54.9 | 64.0 | 73.1 | 82.3 | 86.9 | 90.5  |
| Bourgogne-Franche-Comté    | 0.4       | 2.0 | 4.0  | 7.9  | 11.9 | 15.9 | 19.8 | 23.8 | 27.7 | 31.7 | 35.7 | 37.6 | 39.2  |
| Bretagne                   | 0.5       | 2.3 | 4.7  | 9.3  | 14.0 | 18.6 | 23.3 | 28.0 | 32.6 | 37.3 | 41.9 | 44.3 | 46.1  |
| Centre-Val de Loire        | 0.3       | 1.7 | 3.4  | 6.8  | 10.2 | 13.7 | 17.1 | 20.5 | 23.9 | 27.3 | 30.7 | 32.4 | 33.8  |
| Grand-Est                  | 0.7       | 3.6 | 7.1  | 14.2 | 21.3 | 28.5 | 35.6 | 42.7 | 49.8 | 56.9 | 64.0 | 67.6 | 70.4  |
| Hauts-de-France            | 0.7       | 3.7 | 7.4  | 14.8 | 22.2 | 29.5 | 36.9 | 44.3 | 51.7 | 59.1 | 66.5 | 70.2 | 73.1  |
| Ile-de-France              | 1.0       | 5.1 | 10.3 | 20.6 | 30.9 | 41.2 | 51.5 | 61.8 | 72.1 | 82.3 | 92.6 | 97.8 | 101.9 |
| Normandie                  | 0.9       | 4.3 | 8.6  | 17.2 | 25.7 | 34.3 | 42.9 | 51.5 | 60.0 | 68.6 | 77.2 | 81.5 | 84.9  |
| Nouvelle Aquitaine         | 0.4       | 2.2 | 4.4  | 8.8  | 13.2 | 17.6 | 22.0 | 26.4 | 30.8 | 35.2 | 39.5 | 41.7 | 43.5  |
| Occitanie                  | 0.8       | 3.8 | 7.7  | 15.4 | 23.0 | 30.7 | 38.4 | 46.1 | 53.7 | 61.4 | 69.1 | 72.9 | 76.0  |
| Pays de la Loire           | 0.7       | 3.4 | 6.8  | 13.7 | 20.5 | 27.4 | 34.2 | 41.1 | 47.9 | 54.7 | 61.6 | 65.0 | 67.7  |
| Provence-Alpes-Côte d'Azur | 0.4       | 2.2 | 4.5  | 9.0  | 13.5 | 18.0 | 22.4 | 26.9 | 31.4 | 35.9 | 40.4 | 42.6 | 44.4  |

*Interpretation: In Auvergne-Rhône-Alpes, the quantile 1 for age at death in females corresponds to 0.9 death per day on average during the whole period.*

**Supplementary Table 4** Expected age at death without lockdown, observed age at death during lockdown and average age difference during lockdown by region for each quantile - Males

| Quantile                       | 1           | 5          | 10         | 20         | 30          | 40          | 50          | 60          | 70          | 80          | 90          | 95          | 99          |
|--------------------------------|-------------|------------|------------|------------|-------------|-------------|-------------|-------------|-------------|-------------|-------------|-------------|-------------|
| <i>Auvergne-Rhône-Alpes</i>    |             |            |            |            |             |             |             |             |             |             |             |             |             |
| Expected age                   | 19.0        | 45.5       | 54.4       | 63.2       | 69.1        | 74.4        | 78.8        | 82.3        | 85.2        | 88.1        | 91.3        | 93.6        | 97.8        |
| Lockdown age                   | 28.3        | 49.8       | 57.7       | 66.5       | 71.8        | 76.9        | 80.6        | 83.5        | 86.2        | 88.8        | 91.7        | 93.9        | 97.9        |
| Difference                     | 9.3         | 4.3        | 3.3        | 3.2        | 2.7         | 2.5         | 1.8         | 1.3         | 1.0         | 0.8         | 0.4         | 0.3         | 0.1         |
| [95%CI]                        | [5.6; 13.1] | [2.5; 6.2] | [2.0; 4.5] | [2.3; 4.2] | [1.9; 3.6]  | [1.6; 3.4]  | [1.1; 2.5]  | [0.7; 1.8]  | [0.6; 1.5]  | [0.4; 1.2]  | [0.0; 0.7]  | [-0.1; 0.7] | [-0.4; 0.6] |
| <i>Bourgogne-Franche-Comté</i> |             |            |            |            |             |             |             |             |             |             |             |             |             |
| Expected age                   | 23.3        | 49.3       | 56.9       | 64.7       | 70.2        | 75.4        | 79.5        | 82.8        | 85.7        | 88.5        | 91.8        | 94.0        | 98.3        |
| Lockdown age                   | 30.8        | 52.0       | 59.1       | 66.6       | 71.5        | 76.8        | 80.4        | 83.5        | 86.1        | 88.8        | 92.1        | 94.3        | 98.4        |
| Difference                     | 7.5         | 2.6        | 2.1        | 1.9        | 1.3         | 1.5         | 0.9         | 0.7         | 0.4         | 0.3         | 0.3         | 0.3         | 0.1         |
| [95%CI]                        | [1.1; 14.0] | [0; 5.3.0] | [0.4; 3.9] | [0.5; 3.4] | [-0.1; 2.7] | [0.1; 2.9]  | [-0.3; 2.1] | [-0.3; 1.6] | [-0.3; 1.2] | [-0.4; 1.0] | [-0.4; 0.9] | [-0.4; 1.1] | [-0.8; 0.9] |
| <i>Bretagne</i>                |             |            |            |            |             |             |             |             |             |             |             |             |             |
| Expected age                   | 23.6        | 47.6       | 55.5       | 63.4       | 68.8        | 74.1        | 78.6        | 82.1        | 85.1        | 88.0        | 91.3        | 93.5        | 97.8        |
| Lockdown age                   | 30.7        | 50.7       | 57.7       | 65.5       | 70.3        | 75.3        | 79.6        | 82.6        | 85.1        | 87.7        | 91.2        | 93.5        | 98.2        |
| Difference                     | 7.1         | 3.1        | 2.2        | 2.1        | 1.6         | 1.2         | 1.0         | 0.5         | 0.0         | -0.3        | -0.1        | 0.0         | 0.4         |
| [95%CI]                        | [1.4; 12.8] | [0.8; 5.4] | [0.6; 3.8] | [0.9; 3.3] | [0.4; 2.7]  | [-0.1; 2.6] | [-0.2; 2.1] | [-0.4; 1.3] | [-0.7; 0.7] | [-1.0; 0.3] | [-0.7; 0.6] | [-0.7; 0.6] | [-0.5; 1.4] |
| <i>Centre-Val de Loire</i>     |             |            |            |            |             |             |             |             |             |             |             |             |             |
| Expected age                   | 23.5        | 47.6       | 55.5       | 63.8       | 69.7        | 75.2        | 79.6        | 83.0        | 85.8        | 88.7        | 91.8        | 94.1        | 98.3        |
| Lockdown age                   | 33.3        | 51.5       | 57.8       | 65.4       | 72.0        | 77.6        | 81.2        | 83.9        | 86.7        | 89.4        | 92.1        | 93.9        | 98.1        |
| Difference                     | 9.8         | 3.9        | 2.2        | 1.6        | 2.3         | 2.4         | 1.6         | 1.0         | 0.8         | 0.7         | 0.3         | -0.2        | -0.2        |
| [95%CI]                        | [5.0; 14.6] | [2.1; 5.8] | [0.7; 3.8] | [0.3; 3.0] | [1.0; 3.6]  | [1.1; 3.7]  | [0.6; 2.6]  | [0.2; 1.8]  | [0.2; 1.5]  | [0.1; 1.3]  | [-0.3; 0.8] | [-0.7; 0.3] | [-0.9; 0.6] |
| <i>Grand-Est</i>               |             |            |            |            |             |             |             |             |             |             |             |             |             |
| Expected age                   | 20.4        | 45.5       | 54.0       | 62.1       | 67.6        | 72.8        | 77.4        | 81.0        | 84.0        | 86.9        | 90.3        | 92.6        | 96.9        |
| Lockdown age                   | 29.8        | 51.0       | 58.7       | 66.0       | 70.9        | 76.1        | 79.8        | 82.4        | 84.9        | 87.5        | 90.9        | 93.0        | 97.1        |
| Difference                     | 9.5         | 5.5        | 4.7        | 3.8        | 3.3         | 3.2         | 2.4         | 1.5         | 1.0         | 0.6         | 0.6         | 0.3         | 0.2         |
| [95%CI]                        | [5.9; 13.0] | [3.7; 7.3] | [3.5; 5.9] | [3.0; 4.7] | [2.4; 4.1]  | [2.3; 4.2]  | [1.7; 3.2]  | [0.9; 2.1]  | [0.5; 1.4]  | [0.2; 1.1]  | [0.2; 1]    | [-0.1; 0.7] | [-0.3; 0.7] |
| <i>Hauts-de-France</i>         |             |            |            |            |             |             |             |             |             |             |             |             |             |
| Expected age                   | 20.4        | 44.0       | 52.2       | 59.9       | 65.0        | 69.8        | 74.9        | 79.3        | 82.9        | 86.2        | 89.8        | 92.3        | 96.5        |
| Lockdown age                   | 24.5        | 45.8       | 53.4       | 61.1       | 66.3        | 71.2        | 76.8        | 80.7        | 83.8        | 86.8        | 90.1        | 92.7        | 96.4        |
| Difference                     | 4.1         | 1.8        | 1.3        | 1.2        | 1.3         | 1.4         | 1.9         | 1.4         | 0.9         | 0.6         | 0.3         | 0.4         | -0.1        |
| [95%CI]                        | [0.9; 7.2]  | [0.0; 3.5] | [0.1; 2.4] | [0.4; 2.1] | [0.5; 2.1]  | [0.5; 2.3]  | [0.9; 2.9]  | [0.6; 2.2]  | [0.3; 1.5]  | [0.1; 1.1]  | [-0.2; 0.8] | [-0.1; 0.9] | [-0.6; 0.5] |

95%CI: 95% credibility interval.

**Supplementary Table 4** Expected age at death without lockdown, observed age at death during lockdown and average age difference during lockdown by region for each quantile - Males (continued)

| Quantile                          | 1            | 5           | 10          | 20          | 30          | 40          | 50          | 60          | 70          | 80          | 90          | 95          | 99          |
|-----------------------------------|--------------|-------------|-------------|-------------|-------------|-------------|-------------|-------------|-------------|-------------|-------------|-------------|-------------|
| <i>Ile-de-France</i>              |              |             |             |             |             |             |             |             |             |             |             |             |             |
| Expected age                      | 2.3          | 40.0        | 50.4        | 59.6        | 65.6        | 70.8        | 75.9        | 80.3        | 83.9        | 87.2        | 90.9        | 93.4        | 98.0        |
| Lockdown age                      | 25.3         | 47.6        | 55.3        | 63.8        | 69.3        | 74.4        | 79.6        | 82.9        | 85.5        | 88.2        | 91.6        | 93.9        | 98.3        |
| Difference                        | 23.0         | 7.7         | 4.9         | 4.2         | 3.7         | 3.6         | 3.7         | 2.6         | 1.7         | 1.0         | 0.8         | 0.5         | 0.4         |
| [95%CI]                           | [21.2; 24.9] | [5.8; 9.5]  | [3.8; 6.0]  | [3.3; 5.0]  | [2.9; 4.5]  | [2.8; 4.4]  | [2.9; 4.5]  | [2.0; 3.3]  | [1.2; 2.1]  | [0.6; 1.4]  | [0.4; 1.1]  | [0.1; 0.9]  | [-0.1; 0.8] |
| <i>Normandie</i>                  |              |             |             |             |             |             |             |             |             |             |             |             |             |
| Expected age                      | 21.7         | 45.2        | 53.4        | 61.6        | 67.2        | 72.5        | 77.5        | 81.3        | 84.5        | 87.5        | 90.9        | 93.2        | 97.4        |
| Lockdown age                      | 30.9         | 48.1        | 55.0        | 63.4        | 68.3        | 73.2        | 78.1        | 82.0        | 84.7        | 87.6        | 90.8        | 93.2        | 97.4        |
| Difference                        | 9.2          | 2.8         | 1.6         | 1.8         | 1.1         | 0.7         | 0.6         | 0.6         | 0.3         | 0.1         | -0.1        | 0.0         | 0.0         |
| [95%CI]                           | [3.9; 14.4]  | [1.1; 4.6]  | [0.4; 2.9]  | [0.7; 2.9]  | [0.1; 2.2]  | [-0.5; 1.9] | [-0.5; 1.7] | [-0.2; 1.4] | [-0.4; 0.9] | [-0.4; 0.7] | [-0.6; 0.5] | [-0.6; 0.5] | [-0.7; 0.8] |
| <i>Nouvelle Aquitaine</i>         |              |             |             |             |             |             |             |             |             |             |             |             |             |
| Expected age                      | 24.2         | 47.8        | 55.8        | 64.2        | 70.2        | 75.7        | 79.9        | 83.2        | 86.0        | 88.7        | 91.8        | 94.0        | 98.1        |
| Lockdown age                      | 26.3         | 48.9        | 57.5        | 65.1        | 70.8        | 76.5        | 80.7        | 83.7        | 86.3        | 88.9        | 91.8        | 94.0        | 98.2        |
| Difference                        | 2.1          | 1.1         | 1.7         | 0.9         | 0.6         | 0.8         | 0.7         | 0.5         | 0.4         | 0.2         | 0.0         | 0.0         | 0.0         |
| [95%CI]                           | [-3.0; 7.1]  | [-0.7; 2.9] | [0.4; 2.9]  | [-0.1; 1.9] | [-0.3; 1.6] | [-0.1; 1.8] | [0.0; 1.5]  | [-0.1; 1.1] | [-0.1; 0.8] | [-0.2; 0.6] | [-0.4; 0.4] | [-0.4; 0.4] | [-0.6; 0.7] |
| <i>Occitanie</i>                  |              |             |             |             |             |             |             |             |             |             |             |             |             |
| Expected age                      | 22.2         | 46.8        | 55.3        | 64.1        | 70.1        | 75.6        | 79.8        | 83.1        | 85.9        | 88.7        | 91.8        | 94.0        | 98.2        |
| Lockdown age                      | 28.8         | 49.3        | 56.4        | 64.9        | 70.7        | 75.9        | 80.2        | 83.4        | 86.3        | 89.1        | 91.9        | 94.1        | 98.1        |
| Difference                        | 6.6          | 2.5         | 1.2         | 0.8         | 0.6         | 0.3         | 0.3         | 0.3         | 0.4         | 0.4         | 0.1         | 0.1         | -0.1        |
| [95%CI]                           | [2.2; 11.0]  | [0.5; 4.4]  | [-0.2; 2.5] | [-0.3; 1.9] | [-0.5; 1.6] | [-0.6; 1.3] | [-0.5; 1.2] | [-0.4; 0.9] | [-0.1; 0.9] | [-0.1; 0.8] | [-0.3; 0.5] | [-0.3; 0.6] | [-0.6; 0.4] |
| <i>Pays de la Loire</i>           |              |             |             |             |             |             |             |             |             |             |             |             |             |
| Expected age                      | 20.5         | 45.5        | 53.9        | 62.5        | 68.4        | 74.1        | 78.8        | 82.4        | 85.4        | 88.3        | 91.5        | 93.7        | 98.1        |
| Lockdown age                      | 24.4         | 47.2        | 55.5        | 64.2        | 69.7        | 75.5        | 79.8        | 83.0        | 85.6        | 88.4        | 91.5        | 93.6        | 98.2        |
| Difference                        | 3.9          | 1.7         | 1.6         | 1.7         | 1.3         | 1.4         | 1.0         | 0.6         | 0.3         | 0.1         | 0.0         | -0.2        | 0.1         |
| [95%CI]                           | [-0.7; 8.5]  | [-0.3; 3.7] | [0.0; 3.2]  | [0.5; 2.8]  | [0.2; 2.4]  | [0.1; 2.6]  | [0.0; 2.0]  | [-0.2; 1.3] | [-0.4; 0.9] | [-0.4; 0.6] | [-0.5; 0.6] | [-0.6; 0.3] | [-0.7; 0.9] |
| <i>Provence-Alpes-Côte d'Azur</i> |              |             |             |             |             |             |             |             |             |             |             |             |             |
| Expected age                      | 20.5         | 46.3        | 55.0        | 64.0        | 69.9        | 75.1        | 79.4        | 82.7        | 85.6        | 88.4        | 91.7        | 94.0        | 98.3        |
| Lockdown age                      | 27.6         | 49.1        | 56.9        | 66.1        | 71.7        | 76.4        | 80.0        | 83.1        | 85.9        | 88.6        | 91.9        | 94.4        | 98.4        |
| Difference                        | 7.1          | 2.9         | 1.9         | 2.1         | 1.8         | 1.3         | 0.6         | 0.4         | 0.3         | 0.2         | 0.2         | 0.5         | 0.1         |
| [95%CI]                           | [3.1; 11.0]  | [0.9; 4.9]  | [0.4; 3.5]  | [0.9; 3.2]  | [0.8; 2.8]  | [0.3; 2.3]  | [-0.2; 1.4] | [-0.3; 1.1] | [-0.2; 0.9] | [-0.2; 0.7] | [-0.2; 0.7] | [0.0; 0.9]  | [-0.4; 0.7] |

95%CI: 95% credibility interval.

**Supplementary Table 5** Expected age at death without lockdown, observed age at death during lockdown and average age difference during lockdown by region for each quantile - Females

| Quantile                       | 1            | 5           | 10          | 20          | 30          | 40          | 50          | 60          | 70          | 80          | 90          | 95          | 99          |
|--------------------------------|--------------|-------------|-------------|-------------|-------------|-------------|-------------|-------------|-------------|-------------|-------------|-------------|-------------|
| <i>Auvergne-Rhône-Alpes</i>    |              |             |             |             |             |             |             |             |             |             |             |             |             |
| Expected age                   | 28.4         | 54.1        | 63.4        | 74.2        | 80.3        | 83.8        | 86.4        | 88.6        | 90.6        | 92.6        | 95.4        | 97.7        | 101.9       |
| Lockdown age                   | 39.7         | 57.8        | 66.2        | 76.1        | 81.9        | 84.7        | 86.9        | 88.9        | 90.8        | 92.9        | 95.6        | 97.7        | 101.8       |
| Difference                     | 11.2         | 3.6         | 2.8         | 1.9         | 1.6         | 0.9         | 0.5         | 0.3         | 0.3         | 0.3         | 0.2         | 0.0         | -0.1        |
| [95%CI]                        | [6.5; 16.0]  | [1.9; 5.3]  | [1.4; 4.3]  | [0.8; 3.1]  | [0.9; 2.3]  | [0.4; 1.4]  | [0.1; 0.9]  | [-0.1; 0.7] | [0.0; 0.6]  | [0.0; 0.6]  | [-0.2; 0.5] | [-0.3; 0.3] | [-0.6; 0.4] |
| <i>Bourgogne-Franche-Comté</i> |              |             |             |             |             |             |             |             |             |             |             |             |             |
| Expected age                   | 33.9         | 54.9        | 63.3        | 73.6        | 79.9        | 83.6        | 86.2        | 88.5        | 90.6        | 92.7        | 95.5        | 97.8        | 102.2       |
| Lockdown age                   | 38.8         | 59.1        | 67.5        | 77.2        | 81.9        | 84.7        | 86.8        | 88.7        | 90.9        | 92.9        | 95.5        | 98.0        | 102.6       |
| Difference                     | 4.8          | 4.3         | 4.2         | 3.7         | 2.0         | 1.1         | 0.5         | 0.2         | 0.3         | 0.1         | 0.0         | 0.2         | 0.4         |
| [95%CI]                        | [-1.5; 11.2] | [2.1; 6.5]  | [2.2; 6.2]  | [1.8; 5.6]  | [0.7; 3.2]  | [0.2; 2.1]  | [-0.3; 1.3] | [-0.5; 0.9] | [-0.4; 0.9] | [-0.5; 0.7] | [-0.6; 0.6] | [-0.4; 0.8] | [-0.4; 1.2] |
| <i>Bretagne</i>                |              |             |             |             |             |             |             |             |             |             |             |             |             |
| Expected age                   | 34.8         | 55.1        | 63.6        | 74.4        | 80.6        | 84.0        | 86.6        | 88.7        | 90.7        | 92.7        | 95.3        | 97.5        | 101.6       |
| Lockdown age                   | 39.5         | 57.1        | 64.2        | 74.6        | 80.7        | 84.0        | 86.5        | 88.7        | 90.6        | 92.6        | 95.1        | 97.8        | 101.6       |
| Difference                     | 4.7          | 2.1         | 0.6         | 0.1         | 0.1         | 0.0         | -0.1        | 0.0         | 0.0         | 0.0         | -0.2        | 0.3         | -0.1        |
| [95%CI]                        | [-0.6; 10.1] | [0.3; 3.8]  | [-1.3; 2.5] | [-1.7; 1.9] | [-1.0; 1.3] | [-0.9; 0.9] | [-0.8; 0.6] | [-0.5; 0.6] | [-0.5; 0.5] | [-0.5; 0.5] | [-0.8; 0.4] | [-0.3; 0.8] | [-0.7; 0.5] |
| <i>Centre-Val de Loire</i>     |              |             |             |             |             |             |             |             |             |             |             |             |             |
| Expected age                   | 34.1         | 55.0        | 63.8        | 74.5        | 80.6        | 84.1        | 86.6        | 88.8        | 90.9        | 92.9        | 95.8        | 98.1        | 102.3       |
| Lockdown age                   | 41.4         | 56.6        | 66.3        | 76.6        | 82.1        | 85.0        | 87.3        | 89.4        | 91.1        | 93.0        | 96.1        | 98.5        | 103.2       |
| Difference                     | 7.3          | 1.6         | 2.5         | 2.0         | 1.4         | 0.9         | 0.7         | 0.6         | 0.3         | 0.1         | 0.4         | 0.4         | 1.0         |
| [95%CI]                        | [1.5; 13.1]  | [-0.4; 3.6] | [0.4; 4.6]  | [0.3; 3.7]  | [0.5; 2.4]  | [0.2; 1.7]  | [0.1; 1.3]  | [0.1; 1.1]  | [-0.1; 0.7] | [-0.3; 0.5] | [-0.1; 0.9] | [-0.1; 0.9] | [0.1; 1.8]  |
| <i>Grand-Est</i>               |              |             |             |             |             |             |             |             |             |             |             |             |             |
| Expected age                   | 31.6         | 53.5        | 61.8        | 72.3        | 78.9        | 82.6        | 85.3        | 87.5        | 89.6        | 91.8        | 94.4        | 96.8        | 101.0       |
| Lockdown age                   | 36.9         | 57.3        | 65.5        | 75.5        | 80.8        | 83.8        | 85.9        | 87.9        | 89.9        | 91.9        | 94.6        | 96.9        | 100.8       |
| Difference                     | 5.3          | 3.9         | 3.7         | 3.2         | 1.9         | 1.2         | 0.6         | 0.4         | 0.3         | 0.2         | 0.1         | 0.1         | -0.2        |
| [95%CI]                        | [1.4; 9.3]   | [2.3; 5.4]  | [2.4; 5.0]  | [2.0; 4.3]  | [1.1; 2.6]  | [0.6; 1.7]  | [0.2; 1.0]  | [0.0; 0.7]  | [-0.1; 0.6] | [-0.1; 0.5] | [-0.2; 0.5] | [-0.3; 0.6] | [-0.7; 0.3] |
| <i>Hauts-de-France</i>         |              |             |             |             |             |             |             |             |             |             |             |             |             |
| Expected age                   | 30.2         | 52.2        | 60.2        | 70.4        | 77.8        | 81.9        | 84.7        | 87.0        | 89.2        | 91.4        | 94.0        | 96.4        | 100.7       |
| Lockdown age                   | 33.1         | 53.3        | 62.0        | 72.2        | 79.4        | 82.4        | 85.0        | 87.2        | 89.4        | 91.6        | 94.1        | 96.5        | 101.0       |
| Difference                     | 2.9          | 1.2         | 1.8         | 1.8         | 1.6         | 0.6         | 0.3         | 0.2         | 0.2         | 0.2         | 0.0         | 0.1         | 0.3         |
| [95%CI]                        | [-1.6; 7.5]  | [-0.4; 2.8] | [0.5; 3.0]  | [0.5; 3.1]  | [0.6; 2.6]  | [-0.1; 1.2] | [-0.2; 0.8] | [-0.2; 0.6] | [-0.1; 0.6] | [-0.2; 0.5] | [-0.3; 0.3] | [-0.3; 0.4] | [-0.2; 0.8] |

95%CI: 95% credibility interval.

**Supplementary Table 5** Expected age at death without lockdown, observed age at death during lockdown and average age difference during lockdown by region for each quantile - Females (continued)

| Quantile                          | 1            | 5           | 10          | 20          | 30          | 40          | 50          | 60          | 70          | 80          | 90          | 95          | 99          |
|-----------------------------------|--------------|-------------|-------------|-------------|-------------|-------------|-------------|-------------|-------------|-------------|-------------|-------------|-------------|
| <i>Ile-de-France</i>              |              |             |             |             |             |             |             |             |             |             |             |             |             |
| Expected age                      | 5.1          | 47.9        | 57.7        | 68.6        | 76.5        | 81.5        | 84.9        | 87.5        | 89.9        | 92.3        | 95.4        | 97.8        | 102.3       |
| Lockdown age                      | 30.6         | 53.6        | 63.0        | 72.6        | 80.3        | 83.9        | 86.4        | 88.7        | 90.8        | 92.9        | 95.8        | 98.2        | 102.7       |
| Difference                        | 25.5         | 5.7         | 5.3         | 4.1         | 3.8         | 2.4         | 1.5         | 1.1         | 0.9         | 0.6         | 0.4         | 0.4         | 0.4         |
| [95%CI]                           | [21.9; 29.1] | [4.2; 7.2]  | [4.0; 6.6]  | [2.9; 5.2]  | [2.8; 4.7]  | [1.7; 3.0]  | [1.0; 2.0]  | [0.7; 1.5]  | [0.5; 1.2]  | [0.2; 0.9]  | [0.1; 0.7]  | [0.0; 0.7]  | [-0.1; 0.9] |
| <i>Normandie</i>                  |              |             |             |             |             |             |             |             |             |             |             |             |             |
| Expected age                      | 33.2         | 53.7        | 62.2        | 73.0        | 79.6        | 83.3        | 86.0        | 88.2        | 90.3        | 92.4        | 95.2        | 97.5        | 101.7       |
| Lockdown age                      | 36.7         | 54.8        | 62.0        | 72.9        | 79.6        | 83.3        | 85.9        | 88.2        | 90.3        | 92.4        | 95.1        | 97.5        | 101.5       |
| Difference                        | 3.5          | 1.1         | -0.2        | 0.0         | -0.1        | 0.0         | -0.1        | 0.0         | -0.1        | 0.0         | -0.1        | 0.0         | -0.2        |
| [95%CI]                           | [-1.7; 8.7]  | [-0.9; 3.0] | [-2.0; 1.5] | [-1.8; 1.7] | [-1.2; 1.0] | [-0.8; 0.7] | [-0.7; 0.5] | [-0.5; 0.5] | [-0.5; 0.4] | [-0.4; 0.4] | [-0.4; 0.3] | [-0.4; 0.5] | [-1.0; 0.6] |
| <i>Nouvelle Aquitaine</i>         |              |             |             |             |             |             |             |             |             |             |             |             |             |
| Expected age                      | 36.5         | 55.6        | 64.1        | 75.0        | 81.0        | 84.4        | 86.9        | 89.0        | 91.0        | 93.0        | 95.8        | 98.1        | 102.3       |
| Lockdown age                      | 40.5         | 57.7        | 65.9        | 76.1        | 81.8        | 84.9        | 87.3        | 89.3        | 91.2        | 93.2        | 95.9        | 98.0        | 102.5       |
| Difference                        | 4.0          | 2.1         | 1.7         | 1.1         | 0.8         | 0.5         | 0.4         | 0.3         | 0.3         | 0.2         | 0.1         | -0.1        | 0.3         |
| [95%CI]                           | [-1.1; 9.2]  | [0.4; 3.8]  | [0.3; 3.2]  | [-0.2; 2.4] | [0.0; 1.6]  | [-0.1; 1.0] | [-0.1; 0.8] | [0.0; 0.7]  | [-0.1; 0.6] | [-0.1; 0.5] | [-0.3; 0.5] | [-0.5; 0.3] | [-0.4; 0.9] |
| <i>Occitanie</i>                  |              |             |             |             |             |             |             |             |             |             |             |             |             |
| Expected age                      | 32.9         | 54.6        | 63.5        | 74.4        | 80.6        | 84.2        | 86.7        | 88.8        | 90.8        | 92.8        | 95.6        | 97.8        | 102.0       |
| Lockdown age                      | 36.5         | 54.7        | 64.1        | 75.2        | 81.2        | 84.4        | 86.7        | 88.8        | 90.9        | 93.0        | 95.7        | 97.9        | 102.0       |
| Difference                        | 3.6          | 0.0         | 0.6         | 0.8         | 0.5         | 0.2         | 0.0         | 0.0         | 0.1         | 0.1         | 0.1         | 0.0         | 0.0         |
| [95%CI]                           | [-1.1; 8.4]  | [-1.9; 1.9] | [-0.9; 2.1] | [-0.6; 2.1] | [-0.3; 1.4] | [-0.4; 0.8] | [-0.5; 0.5] | [-0.5; 0.4] | [-0.3; 0.4] | [-0.2; 0.5] | [-0.3; 0.6] | [-0.3; 0.3] | [-0.6; 0.7] |
| <i>Pays de la Loire</i>           |              |             |             |             |             |             |             |             |             |             |             |             |             |
| Expected age                      | 32.1         | 54.3        | 63.3        | 74.4        | 80.6        | 84.1        | 86.7        | 88.8        | 90.8        | 92.8        | 95.7        | 98.0        | 102.1       |
| Lockdown age                      | 35.6         | 56.4        | 65.3        | 75.4        | 81.4        | 84.4        | 86.7        | 88.7        | 90.7        | 92.6        | 95.4        | 97.9        | 102.7       |
| Difference                        | 3.5          | 2.2         | 2.0         | 1.0         | 0.8         | 0.3         | 0.0         | -0.1        | -0.1        | -0.3        | -0.3        | -0.1        | 0.5         |
| [95%CI]                           | [-1.7; 8.7]  | [-0.3; 4.6] | [0.1; 3.9]  | [-0.6; 2.7] | [-0.1; 1.8] | [-0.4; 1.0] | [-0.5; 0.5] | [-0.6; 0.4] | [-0.5; 0.3] | [-0.7; 0.1] | [-0.7; 0.1] | [-0.6; 0.3] | [-0.4; 1.4] |
| <i>Provence-Alpes-Côte d'Azur</i> |              |             |             |             |             |             |             |             |             |             |             |             |             |
| Expected age                      | 31.5         | 54.6        | 63.7        | 74.0        | 80.2        | 83.9        | 86.5        | 88.7        | 90.8        | 92.9        | 95.7        | 98.0        | 102.2       |
| Lockdown age                      | 35.8         | 56.2        | 65.5        | 75.1        | 80.6        | 83.9        | 86.6        | 88.6        | 90.6        | 92.7        | 95.6        | 98.1        | 102.6       |
| Difference                        | 4.4          | 1.5         | 1.7         | 1.1         | 0.4         | 0.1         | 0.1         | -0.2        | -0.2        | -0.1        | -0.1        | 0.0         | 0.4         |
| [95%CI]                           | [-0.2; 9.0]  | [-0.5; 3.6] | [0.2; 3.3]  | [-0.2; 2.4] | [-0.5; 1.3] | [-0.5; 0.7] | [-0.4; 0.5] | [-0.6; 0.3] | [-0.6; 0.2] | [-0.5; 0.2] | [-0.5; 0.3] | [-0.4; 0.5] | [-0.3; 1.2] |

95%CI: 95% credibility interval.

**Supplementary Table 6** Difference in quantile value between lockdown and expected at a fixed age at death, by region – Males

| Age | Quantile difference [95% Credibility Interval] |                                |                   |                            |                   |                        |                      |                           |
|-----|------------------------------------------------|--------------------------------|-------------------|----------------------------|-------------------|------------------------|----------------------|---------------------------|
|     | <i>Auvergne-Rhône-Alpes</i>                    | <i>Bourgogne-Franche-Comté</i> | <i>Bretagne</i>   | <i>Centre-Val de Loire</i> | <i>Grand-Est</i>  | <i>Hauts-de-France</i> | <i>Ile-de-France</i> | <i>Nouvelle Aquitaine</i> |
| 40  | +1.0 [+0.5; +1.6]                              | +0.8 [+0.1; +1.9]              | +0.9 [+0.2; +1.9] | +1.3 [+0.6; +2.3]          | +1.2 [+0.7; +1.8] | +0.4 [+0.0; +0.8]      | +1.4 [+1.1; +1.7]    | +0.2 [-0.2; +0.9]         |
| 41  | +1.0 [+0.5; +1.5]                              | +0.8 [+0.1; +1.9]              | +0.8 [+0.2; +1.8] | +1.2 [+0.5; +2.2]          | +1.2 [+0.7; +1.7] | +0.4 [+0.0; +0.8]      | +1.7 [+1.4; +2.0]    | +0.2 [-0.2; +0.8]         |
| 42  | +0.9 [+0.5; +1.4]                              | +0.8 [+0.0; +1.8]              | +0.8 [+0.2; +1.7] | +1.2 [+0.5; +2.1]          | +1.1 [+0.7; +1.7] | +0.4 [+0.0; +0.8]      | +2.0 [+1.7; +2.3]    | +0.2 [-0.2; +0.8]         |
| 43  | +0.9 [+0.5; +1.4]                              | +0.7 [+0.0; +1.7]              | +0.8 [+0.2; +1.6] | +1.1 [+0.5; +2.0]          | +1.1 [+0.7; +1.6] | +0.3 [+0.0; +0.7]      | +2.3 [+2.0; +2.6]    | +0.2 [-0.2; +0.8]         |
| 44  | +0.9 [+0.5; +1.3]                              | +0.7 [+0.0; +1.6]              | +0.7 [+0.2; +1.6] | +1.1 [+0.5; +1.9]          | +1.1 [+0.7; +1.6] | +0.3 [-0.0; +0.7]      | +2.6 [+2.3; +2.9]    | +0.2 [-0.2; +0.7]         |
| 45  | +0.8 [+0.4; +1.3]                              | +0.7 [+0.0; +1.6]              | +0.7 [+0.1; +1.5] | +1.0 [+0.5; +1.8]          | +1.1 [+0.7; +1.5] | +0.8 [-0.0; +1.1]      | +2.9 [+2.6; +3.2]    | +0.2 [-0.2; +0.7]         |
| 46  | +1.0 [+0.6; +1.4]                              | +0.6 [+0.0; +1.5]              | +0.7 [+0.1; +1.4] | +1.0 [+0.4; +1.7]          | +1.2 [+0.9; +1.7] | +1.1 [+0.0; +1.5]      | +3.2 [+2.8; +3.5]    | +0.2 [-0.1; +0.7]         |
| 47  | +1.4 [+1.0; +1.8]                              | +0.6 [+0.0; +1.4]              | +0.6 [+0.1; +1.3] | +0.9 [+0.4; +1.6]          | +1.6 [+1.3; +2.1] | +1.0 [+0.0; +1.9]      | +3.5 [+2.7; +3.8]    | +0.2 [-0.1; +0.6]         |
| 48  | +1.7 [+1.4; +2.1]                              | +0.5 [+0.0; +1.3]              | +0.8 [+0.3; +1.4] | +1.0 [+0.6; +1.7]          | +2.0 [+1.7; +2.5] | +1.0 [+0.0; +2.1]      | +3.6 [+2.5; +4.1]    | +0.3 [-0.4; +0.7]         |
| 49  | +2.1 [+1.4; +2.5]                              | +0.5 [-0.0; +1.2]              | +1.2 [+0.5; +1.8] | +1.5 [+1.0; +2.1]          | +2.4 [+2.1; +2.8] | +0.9 [+0.0; +2.0]      | +3.4 [+2.4; +4.4]    | +0.7 [-0.3; +1.1]         |
| 50  | +2.4 [+1.3; +2.9]                              | +0.8 [+0.0; +1.5]              | +1.6 [+0.5; +2.2] | +1.9 [+1.2; +2.4]          | +2.8 [+2.2; +3.2] | +0.9 [+0.0; +1.9]      | +3.3 [+2.3; +4.4]    | +0.7 [-0.2; +1.5]         |
| 51  | +2.3 [+1.3; +3.2]                              | +1.3 [+0.0; +1.9]              | +1.9 [+0.5; +2.6] | +2.3 [+1.1; +2.8]          | +3.2 [+2.2; +3.6] | +0.9 [+0.0; +1.8]      | +3.5 [+2.6; +4.6]    | +0.8 [-0.1; +1.8]         |
| 52  | +2.3 [+1.3; +3.4]                              | +1.7 [+0.1; +2.4]              | +1.9 [+0.5; +3.0] | +2.4 [+1.0; +3.1]          | +3.2 [+2.1; +4.0] | +0.8 [+0.0; +1.7]      | +3.9 [+3.1; +4.9]    | +0.8 [-0.1; +1.8]         |
| 53  | +2.2 [+1.2; +3.3]                              | +1.7 [+0.1; +2.8]              | +1.8 [+0.4; +3.4] | +2.2 [+0.8; +3.5]          | +3.1 [+2.1; +4.2] | +1.4 [+0.1; +2.2]      | +4.3 [+3.6; +5.3]    | +0.8 [+0.0; +1.8]         |
| 54  | +2.1 [+1.2; +3.2]                              | +1.6 [+0.1; +3.2]              | +1.7 [+0.4; +3.3] | +2.0 [+0.7; +3.5]          | +3.1 [+2.1; +4.1] | +1.6 [+0.2; +2.8]      | +4.8 [+4.0; +5.6]    | +0.9 [+0.1; +1.8]         |
| 55  | +2.4 [+1.5; +3.4]                              | +1.6 [+0.2; +3.4]              | +1.6 [+0.4; +3.1] | +1.9 [+0.6; +3.3]          | +3.6 [+2.7; +4.7] | +1.6 [+0.2; +3.1]      | +5.2 [+4.1; +6.0]    | +0.9 [+0.2; +1.8]         |
| 56  | +2.9 [+2.0; +3.8]                              | +1.5 [+0.2; +3.3]              | +1.9 [+0.7; +3.3] | +2.0 [+0.7; +3.3]          | +4.2 [+3.4; +5.2] | +1.6 [+0.3; +3.1]      | +5.2 [+4.1; +6.3]    | +1.1 [+0.3; +1.9]         |
| 57  | +3.4 [+2.3; +4.3]                              | +1.5 [+0.3; +3.2]              | +2.4 [+0.8; +3.7] | +2.4 [+0.7; +3.7]          | +4.8 [+4.0; +5.7] | +1.6 [+0.3; +3.0]      | +5.2 [+4.0; +6.4]    | +1.7 [+0.4; +2.5]         |
| 58  | +3.7 [+2.3; +4.7]                              | +2.1 [+0.5; +3.6]              | +2.8 [+0.9; +4.2] | +2.6 [+0.7; +4.1]          | +5.4 [+4.2; +6.2] | +1.6 [+0.4; +2.9]      | +5.1 [+3.9; +6.3]    | +1.9 [+0.3; +3.1]         |
| 59  | +3.7 [+2.3; +5.2]                              | +2.7 [+0.5; +4.1]              | +2.8 [+0.9; +4.7] | +2.5 [+0.6; +4.4]          | +5.7 [+4.2; +6.8] | +1.6 [+0.4; +2.9]      | +5.0 [+3.9; +6.1]    | +1.8 [+0.3; +3.4]         |
| 60  | +3.7 [+2.4; +5.1]                              | +2.7 [+0.5; +4.6]              | +2.8 [+0.9; +4.8] | +2.5 [+0.6; +4.5]          | +5.6 [+4.1; +7.2] | +1.7 [+0.6; +2.9]      | +5.1 [+4.0; +6.2]    | +1.7 [+0.2; +3.2]         |
| 61  | +3.7 [+2.4; +5.1]                              | +2.7 [+0.5; +5.0]              | +2.7 [+1.0; +4.7] | +2.4 [+0.5; +4.3]          | +5.4 [+4.0; +7.0] | +2.3 [+0.8; +3.5]      | +5.6 [+4.6; +6.7]    | +1.5 [+0.1; +3.1]         |
| 62  | +3.7 [+2.4; +5.0]                              | +2.6 [+0.5; +4.9]              | +2.7 [+1.0; +4.6] | +2.3 [+0.4; +4.2]          | +5.3 [+3.9; +6.8] | +2.4 [+0.8; +4.0]      | +6.1 [+5.1; +7.2]    | +1.4 [+0.0; +2.9]         |
| 63  | +3.7 [+2.5; +5.0]                              | +2.6 [+0.6; +4.8]              | +2.7 [+1.1; +4.5] | +2.2 [+0.4; +4.1]          | +5.7 [+4.3; +7.1] | +2.4 [+0.8; +4.0]      | +6.6 [+5.6; +7.6]    | +1.3 [-0.1; +2.8]         |
| 64  | +4.1 [+3.0; +5.4]                              | +2.6 [+0.6; +4.7]              | +3.1 [+1.5; +4.8] | +2.2 [+0.4; +4.0]          | +6.1 [+4.9; +7.5] | +2.4 [+0.8; +4.0]      | +7.0 [+5.5; +8.1]    | +1.2 [-0.2; +2.6]         |
| 65  | +4.7 [+3.6; +5.9]                              | +2.7 [+0.8; +4.8]              | +3.6 [+1.5; +5.3] | +2.6 [+0.6; +4.4]          | +6.6 [+5.4; +7.9] | +2.4 [+0.9; +4.0]      | +6.8 [+5.4; +8.3]    | +1.4 [-0.3; +2.8]         |
| 66  | +5.3 [+3.8; +6.4]                              | +3.2 [+0.7; +5.2]              | +3.8 [+1.3; +5.8] | +2.8 [+0.8; +4.7]          | +7.0 [+5.3; +8.3] | +2.6 [+1.0; +4.1]      | +6.8 [+5.3; +8.3]    | +1.4 [-0.3; +3.1]         |
| 67  | +5.4 [+3.7; +7.0]                              | +3.4 [+0.5; +5.6]              | +3.6 [+1.1; +6.1] | +3.0 [+1.0; +5.1]          | +6.8 [+5.1; +8.6] | +2.7 [+1.0; +4.3]      | +6.9 [+5.5; +8.3]    | +1.3 [-0.4; +3.1]         |
| 68  | +5.3 [+3.5; +7.1]                              | +3.2 [+0.3; +6.1]              | +3.4 [+0.9; +5.9] | +3.2 [+1.2; +5.2]          | +6.6 [+4.9; +8.4] | +2.7 [+1.0; +4.4]      | +7.0 [+5.6; +8.4]    | +1.3 [-0.4; +3.0]         |
| 69  | +5.1 [+3.4; +6.9]                              | +2.9 [+0.1; +5.9]              | +3.2 [+0.7; +5.7] | +3.4 [+1.3; +5.4]          | +6.5 [+4.8; +8.3] | +2.8 [+1.1; +4.5]      | +7.1 [+5.6; +8.5]    | +1.2 [-0.5; +2.9]         |
| 70  | +5.1 [+3.4; +6.9]                              | +2.7 [-0.1; +5.6]              | +3.0 [+0.5; +5.5] | +3.6 [+1.6; +5.6]          | +6.4 [+4.7; +8.1] | +2.8 [+1.1; +4.6]      | +7.1 [+5.6; +8.6]    | +1.1 [-0.6; +2.8]         |



**Supplementary Table 6** Difference in quantile value between lockdown and expected at a fixed age at death, by region - Males (continued)

| Age | Quantile difference [95%Credibility Interval] |                                |                   |                            |                   |                        |                      |                           |
|-----|-----------------------------------------------|--------------------------------|-------------------|----------------------------|-------------------|------------------------|----------------------|---------------------------|
|     | <i>Auvergne-Rhône-Alpes</i>                   | <i>Bourgogne-Franche-Comté</i> | <i>Bretagne</i>   | <i>Centre-Val de Loire</i> | <i>Grand-Est</i>  | <i>Hauts-de-France</i> | <i>Ile-de-France</i> | <i>Nouvelle Aquitaine</i> |
| 71  | +5.1 [+3.5; +6.8]                             | +2.6 [-0.1; +5.5]              | +2.8 [+0.3; +5.3] | +3.8 [+1.8; +5.9]          | +6.2 [+4.6; +8.0] | +2.7 [+1.1; +4.5]      | +7.0 [+5.5; +8.6]    | +1.2 [-0.5; +2.9]         |
| 72  | +5.1 [+3.4; +6.8]                             | +2.6 [-0.1; +5.3]              | +2.7 [+0.1; +5.1] | +4.1 [+1.8; +6.1]          | +6.2 [+4.6; +7.9] | +2.9 [+1.3; +4.5]      | +7.0 [+5.5; +8.6]    | +1.2 [-0.4; +2.9]         |
| 73  | +5.0 [+3.3; +6.8]                             | +2.6 [+0.0; +5.2]              | +2.6 [-0.1; +5.1] | +4.2 [+1.8; +6.4]          | +6.3 [+4.6; +7.9] | +3.0 [+1.4; +4.6]      | +7.0 [+5.5; +8.5]    | +1.3 [-0.4; +3.0]         |
| 74  | +4.9 [+3.2; +6.7]                             | +2.7 [+0.1; +5.3]              | +2.5 [-0.3; +5.0] | +4.2 [+1.9; +6.5]          | +6.5 [+4.8; +8.2] | +3.2 [+1.6; +4.8]      | +7.0 [+5.5; +8.5]    | +1.4 [-0.3; +3.0]         |
| 75  | +5.1 [+3.3; +6.8]                             | +2.8 [+0.1; +5.4]              | +2.6 [-0.3; +5.2] | +4.2 [+1.9; +6.6]          | +6.8 [+5.0; +8.5] | +3.4 [+1.7; +5.1]      | +7.0 [+5.5; +8.5]    | +1.4 [-0.2; +3.1]         |
| 76  | +5.3 [+3.6; +7.1]                             | +3.1 [+0.0; +5.8]              | +2.6 [-0.3; +5.5] | +4.6 [+2.3; +7.0]          | +7.0 [+4.8; +8.8] | +3.9 [+2.1; +5.6]      | +7.1 [+5.6; +8.6]    | +1.6 [-0.2; +3.3]         |
| 77  | +5.5 [+3.3; +7.4]                             | +3.5 [-0.2; +6.3]              | +2.5 [-0.4; +5.6] | +5.1 [+2.3; +7.5]          | +6.6 [+4.4; +9.0] | +4.2 [+1.9; +6.1]      | +7.5 [+6.0; +9.0]    | +1.9 [-0.2; +3.9]         |
| 78  | +5.1 [+2.9; +7.4]                             | +3.1 [-0.4; +6.8]              | +2.3 [-0.4; +5.3] | +5.3 [+1.9; +8.0]          | +6.5 [+4.4; +8.8] | +3.9 [+1.7; +6.4]      | +7.9 [+6.4; +9.4]    | +1.8 [-0.2; +4.1]         |
| 79  | +4.7 [+2.7; +7.0]                             | +2.7 [-0.6; +6.5]              | +2.4 [-0.6; +5.3] | +4.7 [+1.6; +8.5]          | +6.7 [+4.7; +8.9] | +3.7 [+1.6; +6.0]      | +8.3 [+6.6; +9.7]    | +1.8 [-0.1; +3.9]         |
| 80  | +5.0 [+3.0; +7.1]                             | +2.7 [-0.8; +6.2]              | +2.5 [-0.8; +5.7] | +4.5 [+1.6; +7.9]          | +6.7 [+4.0; +8.9] | +3.7 [+1.7; +5.9]      | +8.2 [+6.0; +10.1]   | +1.8 [-0.1; +3.7]         |
| 81  | +4.9 [+2.7; +7.2]                             | +2.6 [-0.8; +6.3]              | +2.1 [-1.0; +5.7] | +4.6 [+1.4; +7.8]          | +5.7 [+3.2; +8.4] | +3.8 [+1.5; +6.0]      | +7.8 [+5.8; +10.1]   | +2.1 [-0.1; +4.3]         |
| 82  | +4.4 [+2.3; +6.7]                             | +2.4 [-0.8; +6.1]              | +1.6 [-1.4; +4.9] | +4.1 [+1.0; +7.7]          | +5.1 [+2.9; +7.6] | +3.4 [+1.2; +5.8]      | +7.6 [+5.6; +9.7]    | +1.9 [-0.1; +4.3]         |
| 83  | +4.3 [+2.3; +6.4]                             | +2.2 [-0.9; +5.7]              | +1.3 [-1.8; +4.6] | +3.5 [+0.7; +6.9]          | +4.5 [+2.4; +6.8] | +2.9 [+1.0; +5.1]      | +7.3 [+5.0; +9.3]    | +1.8 [-0.2; +3.9]         |
| 84  | +4.1 [+2.2; +6.2]                             | +2.1 [-1.0; +5.5]              | +0.7 [-2.2; +3.9] | +3.4 [+0.7; +6.4]          | +3.8 [+1.8; +6.0] | +2.7 [+0.8; +4.7]      | +6.3 [+4.2; +8.6]    | +1.8 [-0.2; +3.9]         |
| 85  | +3.9 [+2.1; +5.8]                             | +1.9 [-1.1; +5.2]              | +0.0 [-2.6; +3.0] | +3.2 [+0.7; +6.0]          | +3.2 [+1.4; +5.2] | +2.3 [+0.5; +4.2]      | +5.4 [+3.6; +7.5]    | +1.6 [-0.3; +3.6]         |
| 86  | +3.7 [+2.0; +5.5]                             | +1.6 [-1.2; +4.7]              | -0.4 [-2.9; +2.2] | +3.1 [+0.6; +5.7]          | +2.8 [+1.1; +4.6] | +2.0 [+0.3; +3.8]      | +4.6 [+3.0; +6.3]    | +1.4 [-0.3; +3.3]         |
| 87  | +3.3 [+1.7; +5.1]                             | +1.4 [-1.4; +4.2]              | -0.8 [-3.2; +1.7] | +2.9 [+0.6; +5.4]          | +2.3 [+0.7; +4.0] | +1.6 [+0.1; +3.2]      | +3.8 [+2.3; +5.5]    | +1.2 [-0.5; +3.0]         |
| 88  | +3.0 [+1.3; +4.7]                             | +1.1 [-1.5; +3.9]              | -0.9 [-2.7; +1.2] | +2.8 [+0.5; +5.2]          | +1.8 [+0.6; +3.1] | +1.4 [-0.1; +2.8]      | +2.9 [+1.6; +4.4]    | +1.0 [-0.7; +2.7]         |
| 89  | +2.3 [+0.8; +3.9]                             | +0.8 [-1.2; +3.4]              | -0.7 [-2.5; +1.1] | +2.5 [+0.3; +4.8]          | +1.8 [+0.5; +3.1] | +1.1 [-0.3; +2.6]      | +2.6 [+1.4; +3.7]    | +0.7 [-0.8; +2.2]         |
| 90  | +1.8 [+0.4; +3.3]                             | +0.9 [-1.2; +3.0]              | -0.5 [-2.3; +1.3] | +2.0 [-0.1; +4.2]          | +1.7 [+0.5; +3.0] | +0.8 [-0.3; +2.2]      | +2.4 [+1.3; +3.5]    | +0.4 [-1.0; +1.8]         |
| 91  | +1.4 [+0.0; +2.8]                             | +0.9 [-1.1; +2.9]              | -0.2 [-1.8; +1.6] | +1.4 [-0.6; +3.6]          | +1.2 [+0.2; +2.3] | +0.7 [-0.2; +1.6]      | +2.1 [+1.0; +3.2]    | +0.2 [-1.3; +1.6]         |
| 92  | +0.7 [-0.1; +1.7]                             | +0.7 [-0.8; +2.7]              | -0.1 [-1.5; +1.3] | +0.7 [-0.8; +2.7]          | +1.0 [-0.0; +1.9] | +0.8 [-0.1; +1.7]      | +1.4 [+0.6; +2.2]    | -0.0 [-1.0; +1.2]         |
| 93  | +0.7 [-0.3; +1.6]                             | +0.7 [-0.9; +2.2]              | -0.1 [-1.3; +1.4] | +0.0 [-1.4; +1.5]          | +0.3 [-0.1; +1.2] | +0.4 [-0.2; +1.0]      | +1.2 [+0.3; +2.0]    | -0.0 [-1.0; +0.9]         |
| 94  | +0.3 [-0.2; +1.0]                             | +0.7 [-0.4; +2.3]              | +0.0 [-0.6; +0.8] | -0.3 [-0.8; +0.9]          | +0.3 [-0.1; +0.7] | +0.2 [-0.3; +0.7]      | +0.4 [+0.1; +1.1]    | -0.0 [-0.4; +0.9]         |
| 95  | +0.2 [-0.2; +0.6]                             | +0.3 [-0.5; +1.0]              | +0.1 [-0.6; +0.7] | -0.2 [-0.8; +0.3]          | +0.3 [-0.2; +0.7] | +0.1 [-0.4; +0.6]      | +0.4 [+0.0; +0.8]    | -0.0 [-0.5; +0.4]         |
| 96  | +0.2 [-0.3; +0.6]                             | +0.2 [-0.6; +0.9]              | +0.2 [-0.5; +0.9] | -0.2 [-0.8; +0.4]          | +0.2 [-0.3; +0.7] | -                      | +0.4 [-0.0; +0.7]    | +0.0 [-0.5; +0.5]         |
| 97  | +0.1 [-0.3; +0.6]                             | +0.1 [-0.7; +0.9]              | +0.3 [-0.5; +1.0] | -0.2 [-0.8; +0.4]          | -                 | -                      | +0.3 [-0.1; +0.7]    | +0.0 [-0.5; +0.5]         |
| 98  | -                                             | -                              | -                 | -                          | -                 | -                      | -                    | -                         |
| 99  | -                                             | -                              | -                 | -                          | -                 | -                      | -                    | -                         |
| 100 | -                                             | -                              | -                 | -                          | -                 | -                      | -                    | -                         |

**Supplementary Table 6** Difference in quantile value between lockdown and expected at a fixed age at death, by region - Males (continued)

| Age | Quantile difference [95%Credibility Interval] |                   |                                        |                         |
|-----|-----------------------------------------------|-------------------|----------------------------------------|-------------------------|
|     | <i>Normandie</i>                              | <i>Occitanie</i>  | <i>Provence-Alpes-<br/>Côte d'Azur</i> | <i>Pays de la Loire</i> |
| 40  | +1.0 [+0.3; +2.0]                             | +0.7 [+0.2; +1.4] | +0.7 [+0.2; +1.3]                      | +0.4 [-0.1; +0.9]       |
| 41  | +0.9 [+0.3; +1.9]                             | +0.7 [+0.2; +1.3] | +0.7 [+0.2; +1.2]                      | +0.4 [-0.1; +0.9]       |
| 42  | +0.9 [+0.3; +1.7]                             | +0.6 [+0.2; +1.3] | +0.7 [+0.2; +1.2]                      | +0.4 [-0.1; +0.9]       |
| 43  | +0.8 [+0.3; +1.6]                             | +0.6 [+0.1; +1.2] | +0.6 [+0.2; +1.1]                      | +0.3 [-0.1; +0.8]       |
| 44  | +0.7 [+0.2; +1.5]                             | +0.6 [+0.1; +1.1] | +0.6 [+0.2; +1.1]                      | +0.3 [-0.0; +0.8]       |
| 45  | +0.7 [+0.2; +1.4]                             | +0.5 [+0.1; +1.1] | +0.6 [+0.2; +1.1]                      | +0.3 [-0.0; +0.8]       |
| 46  | +0.9 [+0.5; +1.6]                             | +0.5 [+0.1; +1.0] | +0.5 [+0.2; +1.0]                      | +0.5 [-0.2; +0.9]       |
| 47  | +1.3 [+0.6; +1.9]                             | +0.5 [+0.2; +1.0] | +0.8 [+0.4; +1.3]                      | +0.9 [-0.1; +1.3]       |
| 48  | +1.7 [+0.5; +2.2]                             | +0.9 [+0.3; +1.4] | +1.2 [+0.5; +1.6]                      | +1.0 [-0.1; +1.7]       |
| 49  | +1.6 [+0.5; +2.5]                             | +1.3 [+0.2; +1.8] | +1.6 [+0.4; +2.0]                      | +1.0 [-0.1; +2.1]       |
| 50  | +1.5 [+0.4; +2.8]                             | +1.4 [+0.2; +2.1] | +1.6 [+0.4; +2.4]                      | +1.0 [-0.1; +2.2]       |
| 51  | +1.4 [+0.4; +2.6]                             | +1.3 [+0.1; +2.5] | +1.5 [+0.4; +2.7]                      | +1.0 [-0.1; +2.1]       |
| 52  | +1.3 [+0.3; +2.4]                             | +1.2 [+0.0; +2.5] | +1.4 [+0.3; +2.7]                      | +1.0 [-0.0; +2.1]       |
| 53  | +1.2 [+0.3; +2.3]                             | +1.1 [-0.0; +2.3] | +1.4 [+0.3; +2.6]                      | +1.0 [-0.0; +2.0]       |
| 54  | +1.4 [+0.5; +2.5]                             | +0.9 [-0.1; +2.1] | +1.3 [+0.3; +2.5]                      | +1.0 [+0.0; +2.0]       |
| 55  | +2.0 [+0.5; +2.9]                             | +0.8 [-0.1; +2.0] | +1.3 [+0.3; +2.4]                      | +1.5 [+0.1; +2.6]       |
| 56  | +2.0 [+0.6; +3.4]                             | +1.1 [-0.3; +2.2] | +1.7 [+0.5; +2.8]                      | +1.8 [+0.1; +3.1]       |
| 57  | +2.0 [+0.6; +3.5]                             | +1.3 [-0.3; +2.6] | +2.1 [+0.5; +3.2]                      | +1.9 [+0.2; +3.6]       |
| 58  | +2.0 [+0.6; +3.5]                             | +1.2 [-0.3; +2.9] | +2.2 [+0.6; +3.7]                      | +1.9 [+0.3; +3.6]       |
| 59  | +2.1 [+0.7; +3.5]                             | +1.2 [-0.3; +2.8] | +2.2 [+0.7; +3.8]                      | +1.9 [+0.3; +3.6]       |
| 60  | +2.1 [+0.7; +3.5]                             | +1.2 [-0.3; +2.7] | +2.2 [+0.7; +3.8]                      | +1.9 [+0.4; +3.5]       |
| 61  | +2.1 [+0.8; +3.5]                             | +1.1 [-0.3; +2.6] | +2.2 [+0.8; +3.8]                      | +1.9 [+0.5; +3.5]       |
| 62  | +2.4 [+1.0; +3.7]                             | +1.1 [-0.3; +2.5] | +2.2 [+0.8; +3.7]                      | +1.9 [+0.6; +3.4]       |
| 63  | +3.0 [+1.1; +4.3]                             | +1.0 [-0.3; +2.4] | +2.2 [+0.9; +3.7]                      | +2.2 [+0.9; +3.7]       |
| 64  | +3.0 [+0.8; +4.9]                             | +1.0 [-0.4; +2.3] | +2.3 [+1.0; +3.7]                      | +2.7 [+0.8; +4.1]       |
| 65  | +2.8 [+0.6; +5.0]                             | +1.3 [-0.5; +2.7] | +2.9 [+1.6; +4.2]                      | +2.8 [+0.7; +4.6]       |
| 66  | +2.6 [+0.4; +4.8]                             | +1.3 [-0.6; +3.2] | +3.4 [+1.5; +4.8]                      | +2.6 [+0.6; +4.7]       |
| 67  | +2.3 [+0.2; +4.5]                             | +1.2 [-0.6; +3.1] | +3.4 [+1.5; +5.3]                      | +2.5 [+0.5; +4.6]       |
| 68  | +2.1 [-0.0; +4.3]                             | +1.1 [-0.7; +3.0] | +3.3 [+1.4; +5.3]                      | +2.4 [+0.4; +4.4]       |
| 69  | +2.0 [-0.2; +4.1]                             | +1.1 [-0.7; +2.9] | +3.2 [+1.4; +5.2]                      | +2.3 [+0.3; +4.4]       |
| 70  | +1.8 [-0.4; +4.0]                             | +1.0 [-0.8; +2.8] | +3.2 [+1.3; +5.1]                      | +2.3 [+0.3; +4.3]       |

**Supplementary Table 6** Difference in quantile value between lockdown and expected at a fixed age at death, by region - Males (continued)

| Age | Quantile difference [95%Credibility Interval] |                   |                                   |                         |
|-----|-----------------------------------------------|-------------------|-----------------------------------|-------------------------|
|     | <i>Normandie</i>                              | <i>Occitanie</i>  | <i>Provence-Alpes-Côte d'Azur</i> | <i>Pays de la Loire</i> |
| 71  | +1.7 [-0.7; +3.9]                             | +1.0 [-0.9; +2.9] | +3.3 [+1.4; +5.2]                 | +2.3 [+0.3; +4.3]       |
| 72  | +1.5 [-0.9; +3.8]                             | +0.9 [-1.0; +2.9] | +3.4 [+1.3; +5.3]                 | +2.3 [+0.3; +4.3]       |
| 73  | +1.4 [-1.0; +3.7]                             | +0.8 [-1.0; +2.8] | +3.2 [+1.1; +5.3]                 | +2.3 [+0.3; +4.3]       |
| 74  | +1.4 [-1.0; +3.8]                             | +0.8 [-1.1; +2.7] | +3.0 [+0.9; +5.1]                 | +2.4 [+0.2; +4.4]       |
| 75  | +1.4 [-1.0; +3.8]                             | +0.7 [-1.2; +2.6] | +2.8 [+0.7; +4.9]                 | +2.7 [+0.2; +4.8]       |
| 76  | +1.3 [-1.0; +3.7]                             | +0.8 [-1.4; +2.7] | +3.0 [+0.6; +5.1]                 | +2.8 [+0.2; +5.2]       |
| 77  | +1.3 [-1.0; +3.6]                             | +0.8 [-1.3; +3.0] | +2.8 [+0.3; +5.3]                 | +2.6 [+0.1; +5.3]       |
| 78  | +1.5 [-1.1; +3.9]                             | +0.8 [-1.2; +3.0] | +2.4 [-0.1; +5.1]                 | +2.4 [+0.0; +5.0]       |
| 79  | +1.6 [-0.9; +4.4]                             | +0.8 [-1.2; +2.9] | +1.9 [-0.4; +4.5]                 | +2.3 [-0.1; +4.8]       |
| 80  | +1.6 [-0.7; +4.4]                             | +0.9 [-1.4; +2.9] | +1.9 [-0.6; +4.3]                 | +2.7 [-0.2; +5.2]       |
| 81  | +1.7 [-0.5; +4.2]                             | +0.9 [-1.3; +3.5] | +1.6 [-0.7; +4.3]                 | +2.3 [-0.3; +5.5]       |
| 82  | +2.0 [-0.7; +4.3]                             | +0.9 [-1.2; +3.2] | +1.4 [-0.7; +3.9]                 | +2.0 [-0.4; +4.8]       |
| 83  | +1.6 [-1.0; +4.4]                             | +0.8 [-1.2; +2.9] | +1.4 [-0.8; +3.6]                 | +1.9 [-0.7; +4.5]       |
| 84  | +1.1 [-1.3; +3.8]                             | +1.0 [-1.0; +3.1] | +1.3 [-0.7; +3.6]                 | +1.5 [-0.9; +4.2]       |
| 85  | +0.8 [-1.4; +3.2]                             | +1.2 [-0.7; +3.1] | +1.2 [-0.6; +3.3]                 | +1.1 [-1.2; +3.6]       |
| 86  | +0.6 [-1.4; +2.8]                             | +1.3 [-0.4; +3.1] | +1.2 [-0.6; +3.1]                 | +0.8 [-1.3; +3.0]       |
| 87  | +0.5 [-1.4; +2.6]                             | +1.4 [-0.3; +3.2] | +1.0 [-0.7; +2.8]                 | +0.6 [-1.4; +2.7]       |
| 88  | +0.3 [-1.4; +2.1]                             | +1.4 [-0.3; +3.1] | +0.9 [-0.8; +2.6]                 | +0.4 [-1.5; +2.4]       |
| 89  | +0.1 [-1.6; +1.9]                             | +1.3 [-0.3; +2.9] | +0.7 [-0.7; +2.1]                 | +0.3 [-1.4; +2.0]       |
| 90  | -0.0 [-1.7; +1.7]                             | +1.0 [-0.6; +2.5] | +0.7 [-0.7; +2.1]                 | +0.2 [-1.5; +1.9]       |
| 91  | -0.1 [-1.3; +1.4]                             | +0.7 [-0.8; +2.2] | +0.7 [-0.7; +2.1]                 | +0.1 [-1.6; +1.9]       |
| 92  | -0.1 [-1.2; +1.0]                             | +0.3 [-0.7; +1.6] | +0.5 [-0.4; +1.8]                 | -0.0 [-1.2; +1.4]       |
| 93  | -0.1 [-0.8; +1.1]                             | +0.3 [-0.7; +1.2] | +0.7 [-0.2; +1.6]                 | -0.2 [-1.3; +1.0]       |
| 94  | -0.0 [-0.6; +0.5]                             | +0.2 [-0.3; +1.2] | +0.9 [-0.0; +1.8]                 | -0.1 [-0.6; +0.3]       |
| 95  | -0.0 [-0.6; +0.5]                             | +0.1 [-0.4; +0.5] | +0.4 [-0.1; +0.9]                 | -0.1 [-0.6; +0.4]       |
| 96  | +0.0 [-0.6; +0.6]                             | +0.0 [-0.5; +0.5] | +0.3 [-0.2; +0.8]                 | -0.0 [-0.6; +0.5]       |
| 97  | -                                             | -0.0 [-0.6; +0.5] | +0.2 [-0.3; +0.8]                 | +0.0 [-0.7; +0.6]       |
| 98  | -                                             | -                 | -                                 | -                       |
| 99  | -                                             | -                 | -                                 | -                       |
| 100 | -                                             | -                 | -                                 | -                       |

**Supplementary Table 7** Difference in quantile value between lockdown and expected at a fixed age at death, by region - Females

| Age | Quantile difference [95%Credibility Interval] |                                |                   |                            |                   |                        |                      |                           |
|-----|-----------------------------------------------|--------------------------------|-------------------|----------------------------|-------------------|------------------------|----------------------|---------------------------|
|     | <i>Auvergne-Rhône-Alpes</i>                   | <i>Bourgogne-Franche-Comté</i> | <i>Bretagne</i>   | <i>Centre-Val de Loire</i> | <i>Grand-Est</i>  | <i>Hauts-de-France</i> | <i>Ile-de-France</i> | <i>Nouvelle Aquitaine</i> |
| 40  | -                                             | -                              | -                 | -                          | -                 | +0.4 [-0.2; +1.3]      | -                    | -                         |
| 41  | -                                             | -                              | -                 | -                          | +0.9 [+0.3; +1.7] | +0.4 [-0.2; +1.2]      | -                    | -                         |
| 42  | -                                             | -                              | -                 | -                          | +0.9 [+0.3; +1.7] | +0.4 [-0.2; +1.2]      | -                    | -                         |
| 43  | -                                             | -                              | -                 | -                          | +0.9 [+0.3; +1.6] | +0.4 [-0.2; +1.1]      | -                    | -                         |
| 44  | -                                             | -                              | -                 | -                          | +0.9 [+0.3; +1.6] | +0.4 [-0.2; +1.1]      | -                    | -                         |
| 45  | +1.4 [+0.7; +2.4]                             | -                              | -                 | -                          | +0.9 [+0.3; +1.5] | +0.3 [-0.1; +1.0]      | +1.2 [+0.9; +1.7]    | -                         |
| 46  | +1.3 [+0.6; +2.3]                             | +0.9 [+0.1; +2.1]              | +0.7 [-0.0; +1.9] | -                          | +0.9 [+0.4; +1.5] | +0.3 [-0.1; +0.9]      | +1.1 [+0.8; +1.6]    | +0.7 [-0.1; +1.9]         |
| 47  | +1.3 [+0.6; +2.2]                             | +0.9 [+0.1; +2.0]              | +0.7 [-0.0; +1.8] | -                          | +0.8 [+0.4; +1.5] | +0.3 [-0.1; +0.9]      | +1.1 [+0.7; +1.5]    | +0.7 [-0.1; +1.8]         |
| 48  | +1.2 [+0.6; +2.1]                             | +0.9 [+0.1; +2.0]              | +0.7 [-0.0; +1.7] | +0.9 [+0.1; +2.4]          | +0.8 [+0.4; +1.4] | +0.3 [-0.1; +0.8]      | +1.0 [+0.7; +1.4]    | +0.7 [-0.0; +1.7]         |
| 49  | +1.1 [+0.5; +2.0]                             | +0.9 [+0.2; +1.9]              | +0.6 [+0.0; +1.6] | +0.9 [+0.0; +2.2]          | +0.8 [+0.4; +1.4] | +0.3 [-0.1; +0.8]      | +1.3 [+1.0; +1.7]    | +0.6 [-0.0; +1.6]         |
| 50  | +1.1 [+0.5; +1.9]                             | +0.9 [+0.2; +1.9]              | +0.6 [+0.0; +1.5] | +0.8 [+0.0; +2.1]          | +0.8 [+0.4; +1.3] | +0.3 [-0.1; +0.7]      | +1.7 [+1.4; +2.0]    | +0.6 [-0.0; +1.6]         |
| 51  | +1.0 [+0.5; +1.8]                             | +0.9 [+0.2; +1.8]              | +0.6 [+0.0; +1.4] | +0.7 [-0.0; +1.9]          | +0.8 [+0.4; +1.3] | +0.2 [-0.1; +0.7]      | +2.0 [+1.7; +2.4]    | +0.6 [+0.0; +1.5]         |
| 52  | +0.9 [+0.4; +1.6]                             | +0.9 [+0.3; +1.8]              | +0.6 [+0.0; +1.4] | +0.6 [-0.0; +1.7]          | +0.8 [+0.4; +1.3] | +0.2 [-0.2; +0.6]      | +2.4 [+2.1; +2.7]    | +0.6 [+0.0; +1.4]         |
| 53  | +0.9 [+0.4; +1.5]                             | +0.9 [+0.3; +1.7]              | +0.5 [+0.0; +1.3] | +0.6 [-0.0; +1.6]          | +0.8 [+0.4; +1.2] | +0.6 [-0.2; +1.0]      | +2.7 [+2.1; +3.0]    | +0.6 [+0.0; +1.3]         |
| 54  | +0.8 [+0.4; +1.4]                             | +0.8 [+0.3; +1.6]              | +0.5 [+0.0; +1.2] | +0.5 [-0.1; +1.4]          | +1.0 [+0.6; +1.4] | +0.8 [-0.1; +1.4]      | +2.9 [+2.1; +3.3]    | +0.5 [+0.1; +1.2]         |
| 55  | +1.1 [+0.7; +1.7]                             | +0.9 [+0.4; +1.6]              | +0.5 [+0.1; +1.1] | +0.4 [-0.2; +1.2]          | +1.4 [+1.1; +1.8] | +0.8 [-0.1; +1.7]      | +2.9 [+2.1; +3.6]    | +0.5 [+0.1; +1.2]         |
| 56  | +1.4 [+1.0; +1.9]                             | +1.3 [+0.8; +2.0]              | +0.8 [+0.1; +1.4] | +0.7 [-0.1; +1.5]          | +1.8 [+1.4; +2.2] | +0.8 [-0.0; +1.7]      | +2.8 [+2.1; +3.6]    | +0.6 [+0.2; +1.2]         |
| 57  | +1.7 [+1.0; +2.2]                             | +1.7 [+1.3; +2.3]              | +1.2 [-0.1; +1.7] | +0.9 [-0.1; +1.7]          | +2.2 [+1.4; +2.5] | +0.9 [+0.1; +1.8]      | +2.8 [+2.1; +3.6]    | +1.0 [+0.2; +1.5]         |
| 58  | +1.9 [+1.0; +2.5]                             | +2.1 [+1.3; +2.7]              | +1.1 [-0.2; +2.0] | +1.0 [-0.1; +1.9]          | +2.3 [+1.4; +2.9] | +0.9 [+0.1; +1.8]      | +2.9 [+2.2; +3.7]    | +1.2 [+0.2; +1.8]         |
| 59  | +1.9 [+0.9; +2.7]                             | +2.5 [+1.3; +3.0]              | +1.0 [-0.3; +2.2] | +1.0 [-0.0; +2.0]          | +2.3 [+1.4; +3.2] | +1.0 [+0.2; +1.8]      | +3.3 [+2.6; +4.1]    | +1.2 [+0.2; +2.1]         |
| 60  | +1.8 [+0.9; +2.8]                             | +2.5 [+1.3; +3.4]              | +0.9 [-0.5; +2.1] | +1.1 [+0.0; +2.1]          | +2.3 [+1.4; +3.2] | +1.0 [+0.2; +1.8]      | +3.7 [+3.0; +4.4]    | +1.2 [+0.2; +2.2]         |
| 61  | +1.8 [+0.9; +2.8]                             | +2.5 [+1.3; +3.7]              | +0.7 [-0.6; +2.0] | +1.1 [+0.1; +2.2]          | +2.3 [+1.4; +3.2] | +1.3 [+0.5; +2.1]      | +4.1 [+3.4; +4.8]    | +1.1 [+0.2; +2.2]         |
| 62  | +1.7 [+0.8; +2.7]                             | +2.5 [+1.3; +3.8]              | +0.6 [-0.7; +1.9] | +1.2 [+0.1; +2.2]          | +2.4 [+1.5; +3.3] | +1.7 [+0.5; +2.5]      | +4.5 [+3.7; +5.2]    | +1.1 [+0.2; +2.1]         |
| 63  | +1.7 [+0.8; +2.6]                             | +2.5 [+1.3; +3.8]              | +0.5 [-1.0; +1.8] | +1.2 [+0.2; +2.3]          | +2.7 [+1.9; +3.6] | +1.7 [+0.5; +2.9]      | +4.9 [+3.6; +5.6]    | +1.1 [+0.2; +2.1]         |
| 64  | +1.9 [+1.0; +2.8]                             | +2.8 [+1.6; +4.1]              | +0.5 [-1.2; +1.8] | +1.4 [+0.3; +2.4]          | +3.0 [+2.2; +3.9] | +1.7 [+0.5; +3.0]      | +4.8 [+3.5; +5.9]    | +1.1 [+0.2; +2.0]         |
| 65  | +2.2 [+1.3; +3.1]                             | +3.2 [+1.9; +4.4]              | +0.5 [-1.3; +2.1] | +1.8 [+0.4; +2.8]          | +3.4 [+2.2; +4.2] | +1.7 [+0.5; +3.0]      | +4.7 [+3.4; +6.0]    | +1.3 [+0.3; +2.3]         |
| 66  | +2.5 [+1.2; +3.4]                             | +3.5 [+2.1; +4.8]              | +0.5 [-1.3; +2.3] | +2.2 [+0.4; +3.3]          | +3.5 [+2.2; +4.5] | +1.7 [+0.5; +3.0]      | +4.5 [+3.3; +5.8]    | +1.6 [+0.2; +2.5]         |
| 67  | +2.6 [+1.1; +3.7]                             | +3.9 [+2.0; +5.1]              | +0.4 [-1.3; +2.3] | +2.3 [+0.4; +3.7]          | +3.4 [+2.2; +4.7] | +1.7 [+0.5; +3.0]      | +4.4 [+3.2; +5.7]    | +1.5 [+0.2; +2.8]         |
| 68  | +2.5 [+1.1; +3.9]                             | +4.0 [+2.0; +5.5]              | +0.4 [-1.4; +2.2] | +2.3 [+0.4; +4.1]          | +3.4 [+2.1; +4.7] | +1.7 [+0.5; +3.0]      | +4.3 [+3.1; +5.6]    | +1.5 [+0.1; +2.9]         |
| 69  | +2.4 [+1.0; +3.8]                             | +4.0 [+2.0; +5.9]              | +0.4 [-1.4; +2.2] | +2.2 [+0.4; +4.2]          | +3.3 [+2.1; +4.6] | +1.7 [+0.5; +3.0]      | +4.3 [+3.1; +5.6]    | +1.4 [+0.1; +2.8]         |
| 70  | +2.3 [+1.0; +3.7]                             | +3.9 [+1.9; +6.0]              | +0.3 [-1.4; +2.1] | +2.2 [+0.4; +4.1]          | +3.3 [+2.1; +4.5] | +1.7 [+0.5; +3.0]      | +4.6 [+3.3; +5.8]    | +1.4 [+0.0; +2.7]         |

**Supplementary Table 7** Difference in quantile value between lockdown and expected at a fixed age at death, by region - Females (continued)

| Age | Quantile difference [95% Credibility Interval] |                                |                   |                            |                   |                        |                      |                           |
|-----|------------------------------------------------|--------------------------------|-------------------|----------------------------|-------------------|------------------------|----------------------|---------------------------|
|     | <i>Auvergne-Rhône-Alpes</i>                    | <i>Bourgogne-Franche-Comté</i> | <i>Bretagne</i>   | <i>Centre-Val de Loire</i> | <i>Grand-Est</i>  | <i>Hauts-de-France</i> | <i>Ile-de-France</i> | <i>Nouvelle Aquitaine</i> |
| 71  | +2.2 [+0.9; +3.6]                              | +3.9 [+1.9; +5.9]              | +0.3 [-1.5; +2.1] | +2.1 [+0.3; +4.1]          | +3.2 [+2.0; +4.5] | +1.9 [+0.7; +3.2]      | +4.8 [+3.6; +6.0]    | +1.3 [-0.0; +2.6]         |
| 72  | +2.1 [+0.9; +3.5]                              | +3.8 [+1.9; +5.9]              | +0.2 [-1.5; +2.0] | +2.1 [+0.3; +4.0]          | +3.2 [+2.0; +4.4] | +2.3 [+0.7; +3.6]      | +5.0 [+3.7; +6.2]    | +1.2 [-0.1; +2.6]         |
| 73  | +2.1 [+0.8; +3.4]                              | +3.8 [+1.8; +5.8]              | +0.2 [-1.6; +1.9] | +2.0 [+0.3; +3.9]          | +3.5 [+2.3; +4.7] | +2.4 [+0.7; +4.0]      | +5.1 [+3.6; +6.4]    | +1.2 [-0.1; +2.5]         |
| 74  | +2.0 [+0.8; +3.3]                              | +4.0 [+2.1; +6.0]              | +0.2 [-2.2; +1.9] | +2.0 [+0.3; +3.8]          | +4.0 [+2.9; +5.2] | +2.3 [+0.7; +4.1]      | +5.0 [+3.6; +6.6]    | +1.1 [-0.2; +2.4]         |
| 75  | +2.5 [+1.3; +3.7]                              | +4.6 [+2.6; +6.6]              | +0.2 [-2.4; +2.2] | +2.3 [+0.6; +4.1]          | +4.6 [+2.9; +5.7] | +2.3 [+0.7; +4.0]      | +5.0 [+3.6; +6.5]    | +1.1 [-0.3; +2.4]         |
| 76  | +3.1 [+1.3; +4.3]                              | +5.1 [+2.6; +7.1]              | +0.2 [-2.2; +2.9] | +3.0 [+0.6; +4.7]          | +4.6 [+2.7; +6.2] | +2.3 [+0.7; +3.9]      | +4.9 [+3.6; +6.4]    | +1.7 [-0.3; +3.0]         |
| 77  | +3.1 [+1.3; +4.9]                              | +5.7 [+2.3; +7.7]              | +0.2 [-2.1; +3.0] | +3.3 [+0.6; +5.3]          | +4.3 [+2.4; +6.4] | +2.2 [+0.8; +3.8]      | +5.2 [+3.9; +6.7]    | +1.7 [-0.2; +3.7]         |
| 78  | +3.0 [+1.3; +4.9]                              | +5.4 [+2.0; +8.2]              | +0.2 [-1.9; +2.8] | +3.1 [+0.7; +6.0]          | +3.9 [+2.2; +5.9] | +2.4 [+1.0; +4.0]      | +5.9 [+4.6; +7.3]    | +1.6 [-0.2; +3.8]         |
| 79  | +2.9 [+1.3; +4.7]                              | +4.8 [+1.7; +8.8]              | +0.2 [-1.8; +2.6] | +2.9 [+0.7; +5.8]          | +3.6 [+2.1; +5.4] | +3.5 [+1.1; +5.0]      | +6.6 [+5.4; +8.0]    | +1.6 [-0.1; +3.6]         |
| 80  | +2.8 [+1.4; +4.4]                              | +4.3 [+1.5; +8.2]              | +0.2 [-2.2; +2.4] | +2.7 [+0.7; +5.4]          | +4.4 [+3.0; +6.1] | +3.3 [+0.6; +6.0]      | +7.3 [+5.3; +8.7]    | +1.5 [-0.1; +3.3]         |
| 81  | +3.5 [+2.2; +5.0]                              | +4.9 [+1.8; +8.4]              | +0.3 [-2.7; +2.8] | +3.0 [+1.2; +5.4]          | +4.9 [+2.6; +6.7] | +2.5 [+0.2; +5.5]      | +7.0 [+4.7; +9.3]    | +1.4 [-0.0; +3.1]         |
| 82  | +4.5 [+2.1; +6.0]                              | +5.3 [+1.4; +8.5]              | +0.2 [-2.6; +3.6] | +4.1 [+1.1; +6.2]          | +4.3 [+2.2; +6.7] | +1.8 [-0.3; +4.4]      | +6.7 [+4.6; +9.2]    | +2.3 [-0.1; +4.1]         |
| 83  | +3.8 [+1.7; +6.3]                              | +4.5 [+0.9; +8.7]              | +0.1 [-2.5; +3.2] | +3.7 [+0.8; +7.0]          | +4.0 [+2.1; +6.1] | +1.8 [-0.4; +4.2]      | +6.9 [+5.1; +9.2]    | +2.0 [-0.2; +4.5]         |
| 84  | +3.3 [+1.4; +5.5]                              | +4.1 [+0.5; +8.1]              | -0.0 [-3.2; +2.8] | +3.2 [+0.6; +6.3]          | +4.1 [+1.7; +6.3] | +1.4 [-0.6; +3.6]      | +7.0 [+4.5; +9.1]    | +1.6 [-0.3; +3.9]         |
| 85  | +3.4 [+1.2; +5.5]                              | +3.9 [-0.2; +7.9]              | -0.2 [-3.2; +3.3] | +3.6 [+0.6; +6.4]          | +3.1 [+0.9; +5.5] | +1.3 [-0.8; +3.3]      | +6.0 [+3.8; +8.5]    | +1.8 [-0.3; +3.9]         |
| 86  | +2.7 [+0.7; +4.9]                              | +2.9 [-0.9; +7.2]              | -0.4 [-3.1; +2.7] | +3.2 [+0.5; +6.4]          | +2.6 [+0.5; +4.8] | +1.1 [-0.8; +3.2]      | +5.7 [+3.7; +7.9]    | +1.7 [-0.3; +3.9]         |
| 87  | +2.4 [+0.4; +4.4]                              | +2.2 [-1.6; +6.3]              | -0.4 [-3.1; +2.6] | +3.1 [+0.5; +5.9]          | +2.1 [+0.1; +4.2] | +1.0 [-0.9; +2.9]      | +5.2 [+3.3; +7.3]    | +1.7 [-0.2; +3.6]         |
| 88  | +1.9 [-0.0; +3.9]                              | +1.5 [-2.1; +5.5]              | -0.0 [-2.6; +2.7] | +3.0 [+0.4; +5.8]          | +1.7 [-0.1; +3.5] | +1.0 [-0.8; +2.9]      | +4.8 [+3.1; +6.8]    | +1.7 [-0.2; +3.8]         |
| 89  | +1.5 [-0.2; +3.4]                              | +1.0 [-2.0; +4.5]              | +0.2 [-2.7; +2.9] | +2.9 [+0.2; +5.5]          | +1.5 [-0.2; +3.2] | +1.1 [-0.6; +2.8]      | +4.5 [+2.8; +6.4]    | +1.6 [-0.2; +3.5]         |
| 90  | +1.5 [-0.2; +3.2]                              | +1.1 [-1.8; +4.2]              | +0.0 [-2.7; +2.9] | +2.4 [-0.2; +5.4]          | +1.2 [-0.3; +2.9] | +1.0 [-0.6; +2.6]      | +4.0 [+2.3; +5.8]    | +1.6 [-0.3; +3.5]         |
| 91  | +1.4 [-0.1; +2.9]                              | +1.1 [-1.9; +4.1]              | -0.1 [-2.6; +2.6] | +1.5 [-0.7; +4.0]          | +1.0 [-0.5; +2.6] | +0.9 [-0.7; +2.5]      | +3.5 [+1.9; +5.1]    | +1.4 [-0.4; +3.2]         |
| 92  | +1.4 [-0.0; +2.9]                              | +0.8 [-2.1; +3.8]              | -0.1 [-2.6; +2.5] | +1.0 [-1.1; +3.0]          | +0.7 [-0.5; +2.1] | +0.6 [-0.7; +1.9]      | +2.9 [+1.3; +4.5]    | +1.2 [-0.5; +2.9]         |
| 93  | +1.0 [-0.1; +2.4]                              | +0.4 [-1.8; +3.2]              | -0.2 [-2.4; +2.1] | +0.4 [-0.9; +2.4]          | +0.6 [-0.7; +1.8] | +0.3 [-0.9; +1.6]      | +1.8 [+0.7; +3.2]    | +1.0 [-0.4; +2.6]         |
| 94  | +0.9 [-0.3; +2.0]                              | +0.2 [-2.0; +2.4]              | -0.5 [-2.8; +1.7] | +0.7 [-0.7; +1.9]          | +0.5 [-0.9; +1.9] | +0.1 [-0.6; +1.3]      | +1.7 [+0.6; +2.7]    | +0.7 [-0.6; +1.9]         |
| 95  | +0.7 [-0.5; +1.9]                              | +0.1 [-2.0; +2.3]              | -0.8 [-2.0; +1.5] | +1.0 [-0.5; +2.3]          | +0.3 [-0.5; +1.1] | +0.1 [-0.6; +0.8]      | +1.5 [+0.4; +2.6]    | +0.6 [-0.8; +1.9]         |
| 96  | +0.3 [-0.5; +1.0]                              | +0.1 [-1.1; +1.4]              | -0.1 [-1.2; +0.9] | +1.0 [-0.2; +2.4]          | +0.3 [-0.6; +1.1] | +0.1 [-0.6; +0.9]      | +0.9 [+0.2; +1.7]    | +0.3 [-0.7; +1.6]         |
| 97  | +0.1 [-0.7; +0.8]                              | +0.3 [-1.0; +1.5]              | +0.3 [-0.8; +1.3] | +0.8 [-0.2; +1.8]          | +0.1 [-0.3; +0.9] | +0.1 [-0.2; +0.4]      | +0.8 [+0.1; +1.5]    | +0.1 [-0.9; +1.0]         |
| 98  | -0.0 [-0.4; +0.2]                              | +0.2 [-0.4; +1.4]              | +0.2 [-0.4; +1.1] | +0.8 [-0.2; +1.8]          | +0.0 [-0.4; +0.5] | +0.1 [-0.2; +0.5]      | +0.6 [+0.0; +1.2]    | -0.1 [-0.5; +0.8]         |
| 99  | -0.1 [-0.4; +0.3]                              | +0.2 [-0.4; +0.8]              | +0.1 [-0.5; +0.8] | +0.4 [-0.0; +0.8]          | -0.0 [-0.5; +0.4] | +0.2 [-0.2; +0.6]      | +0.3 [+0.0; +0.6]    | +0.0 [-0.4; +0.4]         |
| 100 | -0.1 [-0.5; +0.3]                              | +0.3 [-0.4; +0.8]              | +0.1 [-0.6; +0.7] | +0.5 [+0.0; +1.0]          | -0.1 [-0.6; +0.3] | +0.2 [-0.2; +0.6]      | +0.3 [-0.0; +0.7]    | +0.1 [-0.4; +0.5]         |

**Supplementary Table 7** Difference in quantile value between lockdown and expected at a fixed age at death, by region - Females (continued)

| Age | Quantile difference [95% Credibility Interval] |                   |                                        |                         |
|-----|------------------------------------------------|-------------------|----------------------------------------|-------------------------|
|     | <i>Normandie</i>                               | <i>Occitanie</i>  | <i>Provence-Alpes-<br/>Côte d'Azur</i> | <i>Pays de la Loire</i> |
| 40  | -                                              | -                 | -                                      | -                       |
| 41  | -                                              | -                 | +0.6 [-0.1; +1.5]                      | +0.6 [-0.2; +1.6]       |
| 42  | +0.5 [-0.3; +1.7]                              | +0.5 [-0.3; +1.5] | +0.6 [-0.1; +1.5]                      | +0.6 [-0.2; +1.5]       |
| 43  | +0.5 [-0.3; +1.6]                              | +0.4 [-0.3; +1.4] | +0.6 [-0.1; +1.4]                      | +0.5 [-0.2; +1.5]       |
| 44  | +0.5 [-0.2; +1.5]                              | +0.4 [-0.3; +1.3] | +0.6 [-0.1; +1.4]                      | +0.5 [-0.2; +1.4]       |
| 45  | +0.5 [-0.2; +1.5]                              | +0.4 [-0.3; +1.2] | +0.5 [-0.1; +1.3]                      | +0.5 [-0.1; +1.4]       |
| 46  | +0.4 [-0.2; +1.4]                              | +0.3 [-0.3; +1.2] | +0.5 [-0.1; +1.3]                      | +0.5 [-0.1; +1.3]       |
| 47  | +0.4 [-0.2; +1.3]                              | +0.3 [-0.3; +1.1] | +0.5 [-0.1; +1.2]                      | +0.5 [-0.1; +1.3]       |
| 48  | +0.4 [-0.2; +1.2]                              | +0.2 [-0.3; +1.0] | +0.5 [-0.1; +1.2]                      | +0.5 [-0.1; +1.3]       |
| 49  | +0.4 [-0.2; +1.2]                              | +0.2 [-0.3; +0.9] | +0.4 [-0.1; +1.1]                      | +0.5 [-0.1; +1.2]       |
| 50  | +0.3 [-0.2; +1.1]                              | +0.2 [-0.3; +0.9] | +0.4 [-0.1; +1.0]                      | +0.5 [-0.1; +1.2]       |
| 51  | +0.3 [-0.2; +1.0]                              | +0.1 [-0.3; +0.8] | +0.4 [-0.1; +1.0]                      | +0.5 [-0.1; +1.1]       |
| 52  | +0.3 [-0.2; +0.9]                              | +0.1 [-0.3; +0.7] | +0.4 [-0.1; +0.9]                      | +0.4 [-0.1; +1.1]       |
| 53  | +0.3 [-0.3; +0.9]                              | +0.1 [-0.4; +0.6] | +0.3 [-0.1; +0.9]                      | +0.4 [-0.1; +1.1]       |
| 54  | +0.3 [-0.6; +0.9]                              | +0.0 [-0.8; +0.6] | +0.3 [-0.1; +0.8]                      | +0.4 [-0.0; +1.0]       |
| 55  | +0.6 [-0.7; +1.2]                              | +0.0 [-1.0; +0.6] | +0.4 [-0.3; +0.9]                      | +0.7 [-0.1; +1.3]       |
| 56  | +0.5 [-0.8; +1.5]                              | +0.0 [-0.9; +0.9] | +0.8 [-0.2; +1.2]                      | +1.0 [-0.1; +1.6]       |
| 57  | +0.4 [-0.9; +1.7]                              | +0.1 [-0.8; +1.1] | +0.8 [-0.2; +1.6]                      | +1.2 [-0.1; +1.9]       |
| 58  | +0.3 [-1.0; +1.6]                              | +0.1 [-0.8; +1.1] | +0.9 [-0.1; +1.9]                      | +1.2 [-0.1; +2.2]       |
| 59  | +0.2 [-1.0; +1.5]                              | +0.2 [-0.7; +1.1] | +0.9 [-0.1; +1.9]                      | +1.2 [-0.0; +2.5]       |
| 60  | +0.1 [-1.1; +1.4]                              | +0.2 [-0.7; +1.1] | +0.9 [-0.1; +1.9]                      | +1.2 [-0.0; +2.5]       |
| 61  | -0.0 [-1.4; +1.2]                              | +0.2 [-0.6; +1.1] | +0.9 [-0.0; +1.9]                      | +1.1 [+0.0; +2.4]       |
| 62  | -0.1 [-1.7; +1.1]                              | +0.3 [-0.5; +1.1] | +0.9 [+0.0; +1.9]                      | +1.1 [+0.0; +2.4]       |
| 63  | -0.2 [-1.8; +1.2]                              | +0.3 [-0.7; +1.1] | +0.9 [+0.1; +1.9]                      | +1.1 [+0.1; +2.3]       |
| 64  | -0.2 [-1.8; +1.4]                              | +0.5 [-0.8; +1.3] | +1.0 [+0.2; +2.0]                      | +1.3 [+0.1; +2.5]       |
| 65  | -0.2 [-1.7; +1.4]                              | +0.5 [-0.8; +1.7] | +1.5 [+0.1; +2.4]                      | +1.7 [+0.0; +2.8]       |
| 66  | -0.1 [-1.7; +1.4]                              | +0.6 [-0.7; +1.9] | +1.7 [+0.1; +2.8]                      | +1.8 [-0.1; +3.1]       |
| 67  | -0.1 [-1.7; +1.4]                              | +0.6 [-0.7; +1.9] | +1.6 [+0.1; +3.2]                      | +1.7 [-0.1; +3.4]       |
| 68  | -0.1 [-1.7; +1.5]                              | +0.6 [-0.7; +1.9] | +1.5 [+0.0; +3.1]                      | +1.6 [-0.2; +3.4]       |
| 69  | -0.1 [-1.7; +1.5]                              | +0.6 [-0.6; +1.9] | +1.5 [-0.0; +3.0]                      | +1.5 [-0.2; +3.3]       |
| 70  | -0.1 [-1.7; +1.5]                              | +0.6 [-0.6; +1.9] | +1.4 [-0.0; +2.9]                      | +1.4 [-0.3; +3.2]       |

**Supplementary Table 7** Difference in quantile value between lockdown and expected at a fixed age at death, by region - Females (continued)

| Age | Quantile difference [95%Credibility Interval] |                   |                                   |                         |
|-----|-----------------------------------------------|-------------------|-----------------------------------|-------------------------|
|     | <i>Normandie</i>                              | <i>Occitanie</i>  | <i>Provence-Alpes-Côte d'Azur</i> | <i>Pays de la Loire</i> |
| 71  | -0.1 [-1.6; +1.5]                             | +0.6 [-0.6; +1.9] | +1.3 [-0.1; +2.8]                 | +1.3 [-0.4; +3.1]       |
| 72  | -0.1 [-2.0; +1.5]                             | +0.7 [-0.6; +1.9] | +1.3 [-0.1; +2.8]                 | +1.2 [-0.4; +3.0]       |
| 73  | -0.1 [-2.4; +1.5]                             | +0.7 [-0.5; +1.9] | +1.2 [-0.1; +2.7]                 | +1.1 [-0.5; +2.9]       |
| 74  | -0.1 [-2.3; +2.1]                             | +0.7 [-0.6; +1.9] | +1.1 [-0.3; +2.6]                 | +1.1 [-0.6; +2.8]       |
| 75  | -0.1 [-2.2; +2.5]                             | +1.1 [-0.8; +2.3] | +1.7 [-0.4; +3.1]                 | +1.4 [-0.8; +3.1]       |
| 76  | -0.1 [-2.0; +2.3]                             | +1.2 [-0.8; +3.0] | +1.6 [-0.5; +3.7]                 | +1.6 [-0.7; +3.7]       |
| 77  | -0.1 [-1.9; +2.1]                             | +1.1 [-0.7; +3.3] | +1.4 [-0.5; +3.7]                 | +1.6 [-0.6; +4.3]       |
| 78  | -0.1 [-1.8; +2.0]                             | +1.1 [-0.7; +3.1] | +1.2 [-0.6; +3.4]                 | +1.5 [-0.5; +4.0]       |
| 79  | -0.1 [-2.2; +1.8]                             | +1.0 [-0.6; +2.8] | +1.0 [-0.7; +3.0]                 | +1.5 [-0.4; +3.8]       |
| 80  | -0.2 [-2.7; +2.1]                             | +0.9 [-0.5; +2.6] | +0.8 [-1.1; +2.7]                 | +1.4 [-0.2; +3.5]       |
| 81  | -0.1 [-2.5; +2.6]                             | +1.3 [-1.0; +2.9] | +1.1 [-1.3; +3.3]                 | +1.9 [-0.5; +3.7]       |
| 82  | -0.1 [-2.2; +2.4]                             | +1.2 [-1.0; +3.9] | +0.8 [-1.4; +3.4]                 | +2.1 [-0.7; +4.7]       |
| 83  | -0.1 [-2.5; +2.2]                             | +0.9 [-1.1; +3.3] | +0.5 [-1.5; +2.8]                 | +1.5 [-1.0; +4.5]       |
| 84  | -0.2 [-2.7; +2.7]                             | +0.7 [-1.4; +2.7] | +0.3 [-1.9; +2.4]                 | +1.0 [-1.6; +3.7]       |
| 85  | -0.3 [-2.6; +2.3]                             | +0.6 [-1.7; +3.0] | +0.2 [-1.8; +2.5]                 | +0.8 [-1.9; +3.9]       |
| 86  | -0.4 [-2.8; +2.0]                             | +0.3 [-1.8; +2.5] | +0.2 [-1.6; +2.3]                 | +0.3 [-2.0; +3.1]       |
| 87  | -0.2 [-2.5; +2.2]                             | +0.0 [-2.1; +2.2] | -0.0 [-2.2; +2.4]                 | -0.1 [-2.5; +2.5]       |
| 88  | -0.0 [-2.3; +2.2]                             | -0.1 [-2.1; +2.0] | -0.5 [-2.5; +1.8]                 | -0.3 [-2.6; +2.2]       |
| 89  | -0.1 [-2.4; +2.3]                             | -0.1 [-2.1; +1.9] | -0.8 [-2.7; +1.2]                 | -0.4 [-2.8; +2.0]       |
| 90  | -0.2 [-2.3; +2.0]                             | +0.1 [-1.7; +2.0] | -0.9 [-2.7; +1.1]                 | -0.5 [-2.7; +1.8]       |
| 91  | -0.1 [-2.1; +1.8]                             | +0.3 [-1.3; +2.1] | -0.8 [-2.5; +0.9]                 | -0.7 [-2.9; +1.5]       |
| 92  | +0.1 [-1.8; +2.0]                             | +0.5 [-1.0; +2.1] | -0.7 [-2.3; +1.0]                 | -1.1 [-3.3; +1.0]       |
| 93  | +0.0 [-1.4; +1.6]                             | +0.5 [-0.7; +2.0] | -0.5 [-1.7; +0.9]                 | -1.0 [-2.4; +0.4]       |
| 94  | -0.1 [-1.5; +1.4]                             | +0.5 [-0.8; +1.7] | -0.4 [-1.7; +0.8]                 | -1.0 [-2.4; +0.4]       |
| 95  | -0.2 [-1.2; +1.2]                             | +0.5 [-0.9; +1.9] | -0.4 [-1.7; +0.8]                 | -1.0 [-2.3; +0.4]       |
| 96  | -0.1 [-0.9; +0.8]                             | +0.3 [-0.6; +1.4] | -0.2 [-1.0; +0.5]                 | -0.5 [-1.3; +0.3]       |
| 97  | +0.0 [-0.8; +0.9]                             | +0.1 [-0.7; +1.0] | -0.1 [-0.9; +0.7]                 | -0.4 [-1.2; +0.5]       |
| 98  | +0.0 [-0.5; +0.4]                             | +0.0 [-0.3; +0.6] | +0.1 [-0.4; +0.9]                 | -0.1 [-0.5; +0.6]       |
| 99  | -0.0 [-0.6; +0.5]                             | +0.0 [-0.4; +0.4] | +0.1 [-0.3; +0.5]                 | +0.0 [-0.5; +0.5]       |
| 100 | -0.1 [-0.8; +0.5]                             | +0.0 [-0.5; +0.4] | +0.2 [-0.3; +0.6]                 | +0.2 [-0.4; +0.7]       |

**Supplementary Figure 1** Expected age at death without lockdown and observed age with lockdown for each quantile in Auvergne-Rhône-Alpes

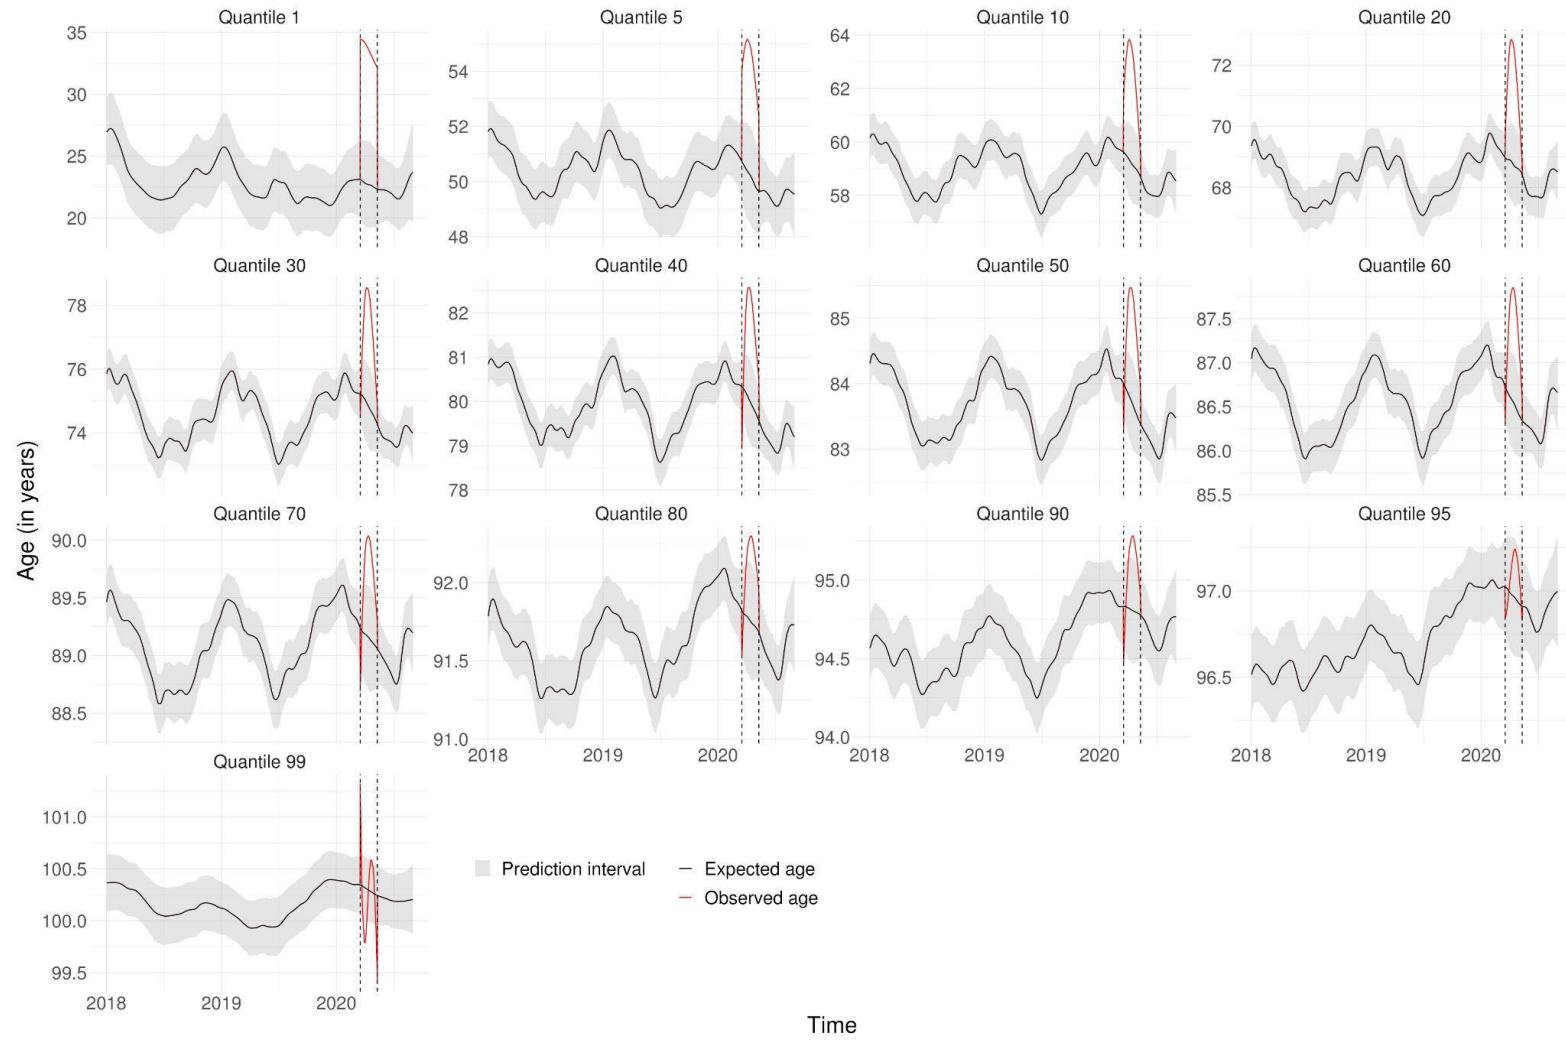



**Supplementary Figure 2** Expected age at death without lockdown and observed age with lockdown for each quantile in Centre-Val de Loire

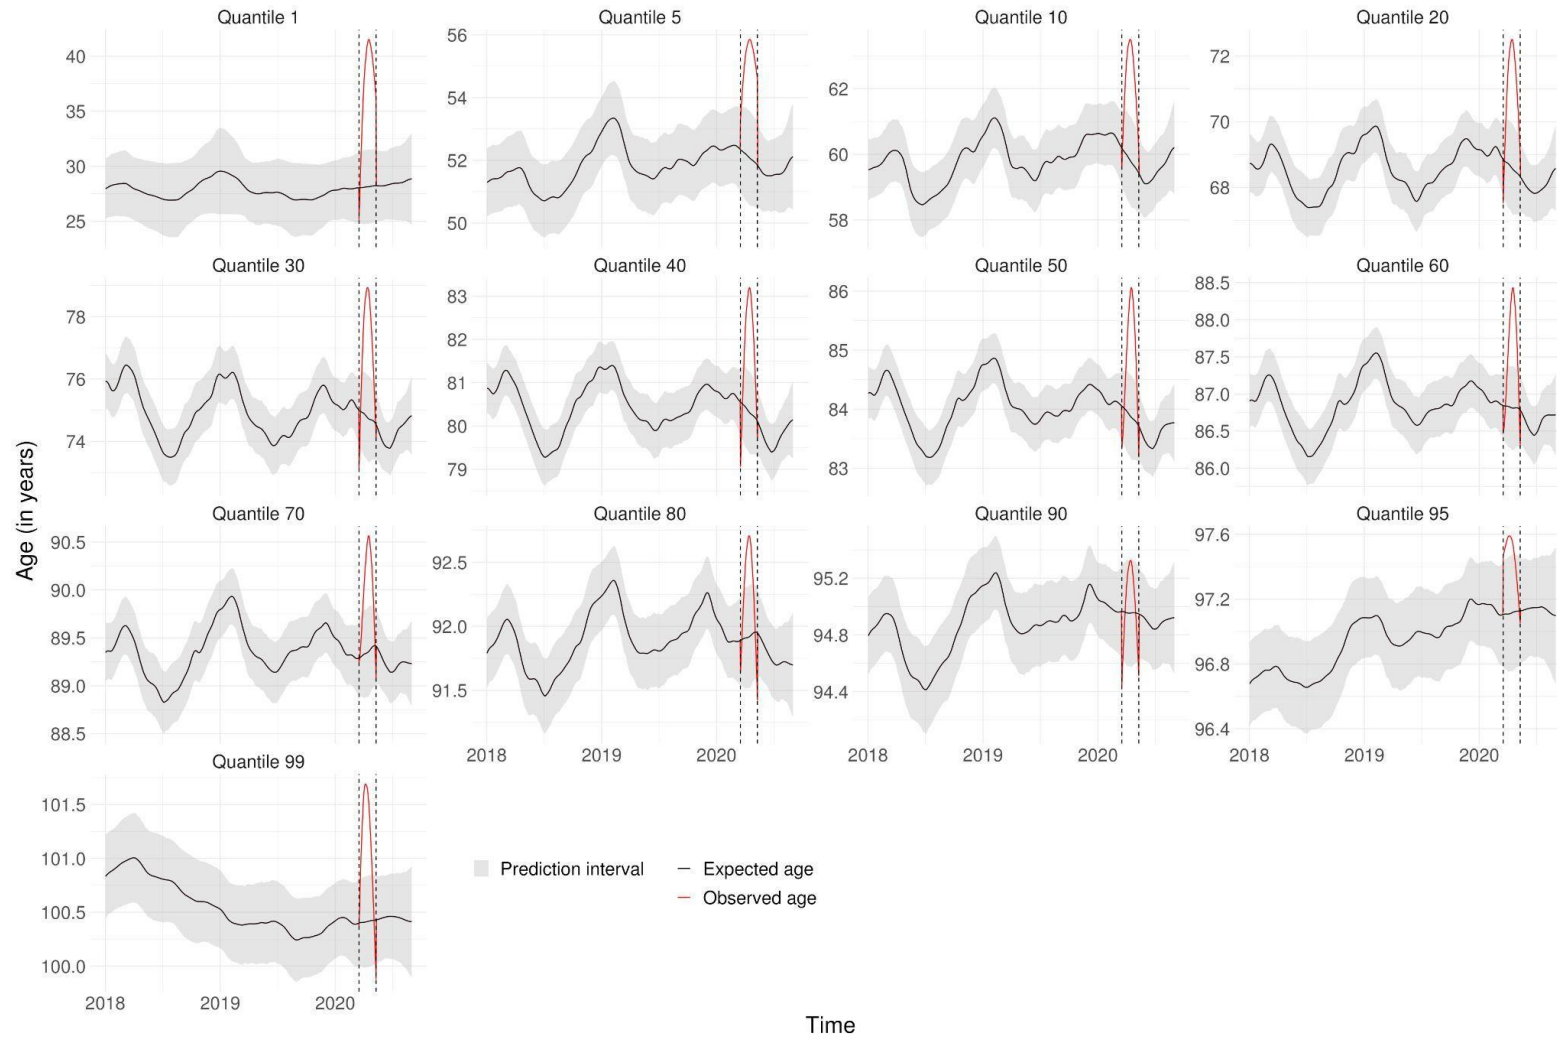

**Supplementary Figure 3** Expected age at death without lockdown and observed age with lockdown for each quantile in Grand-Est

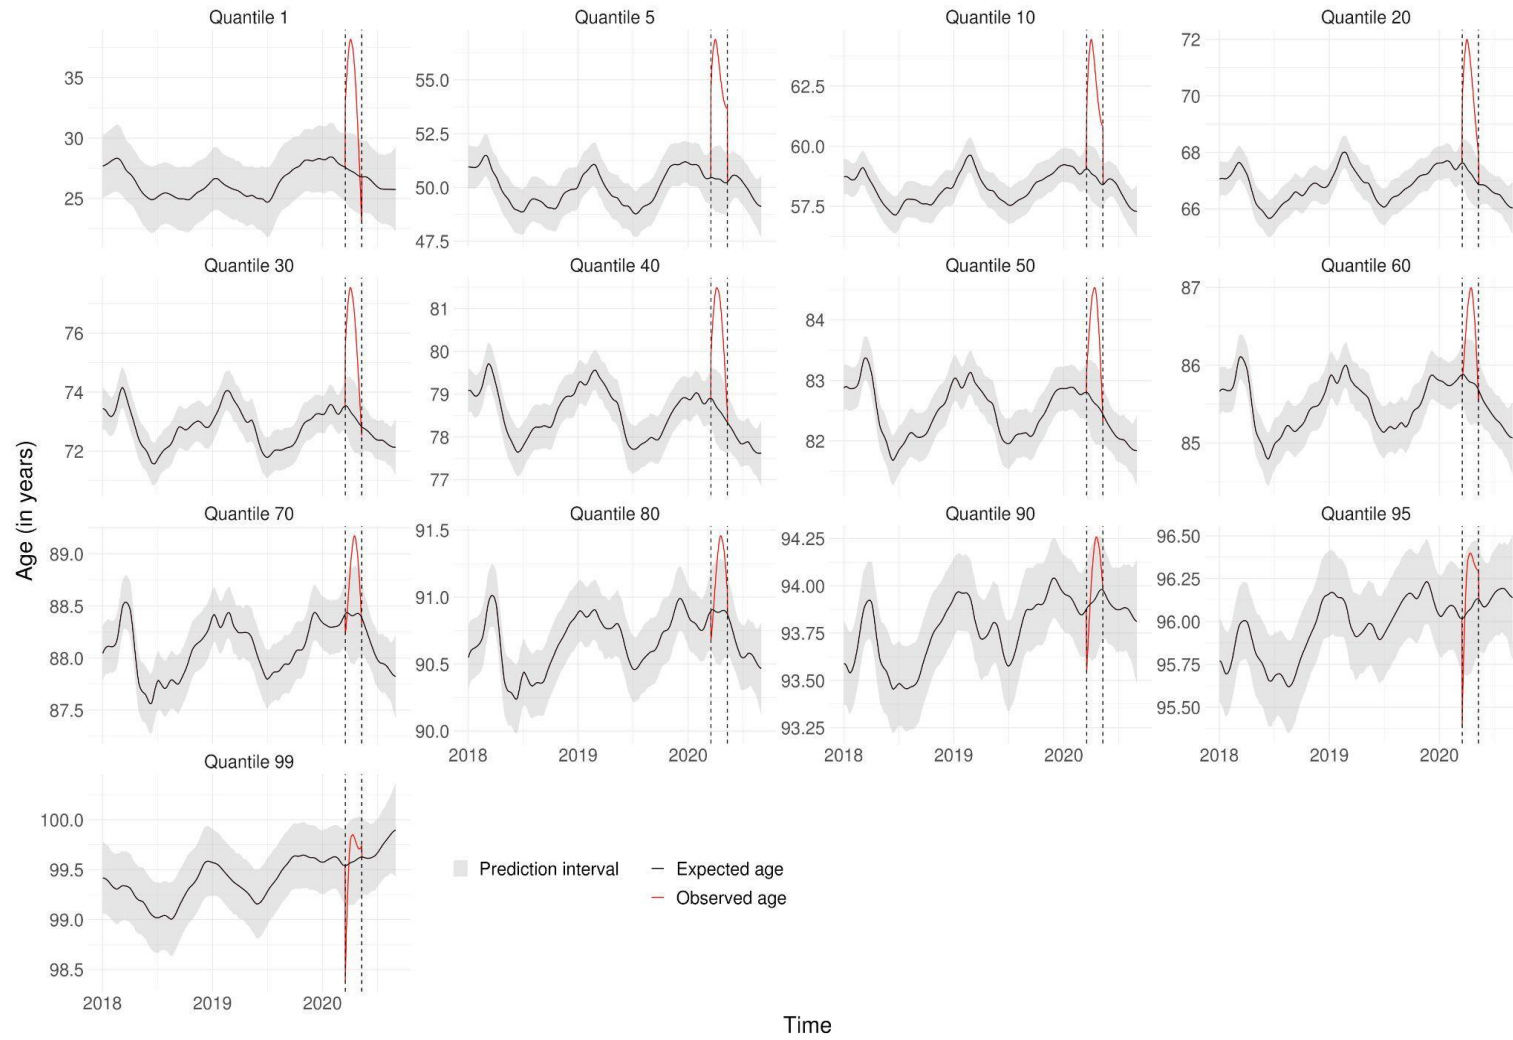

**Supplementary Figure 4** Expected age at death without lockdown and observed age with lockdown for each quantile in Hauts-de-France

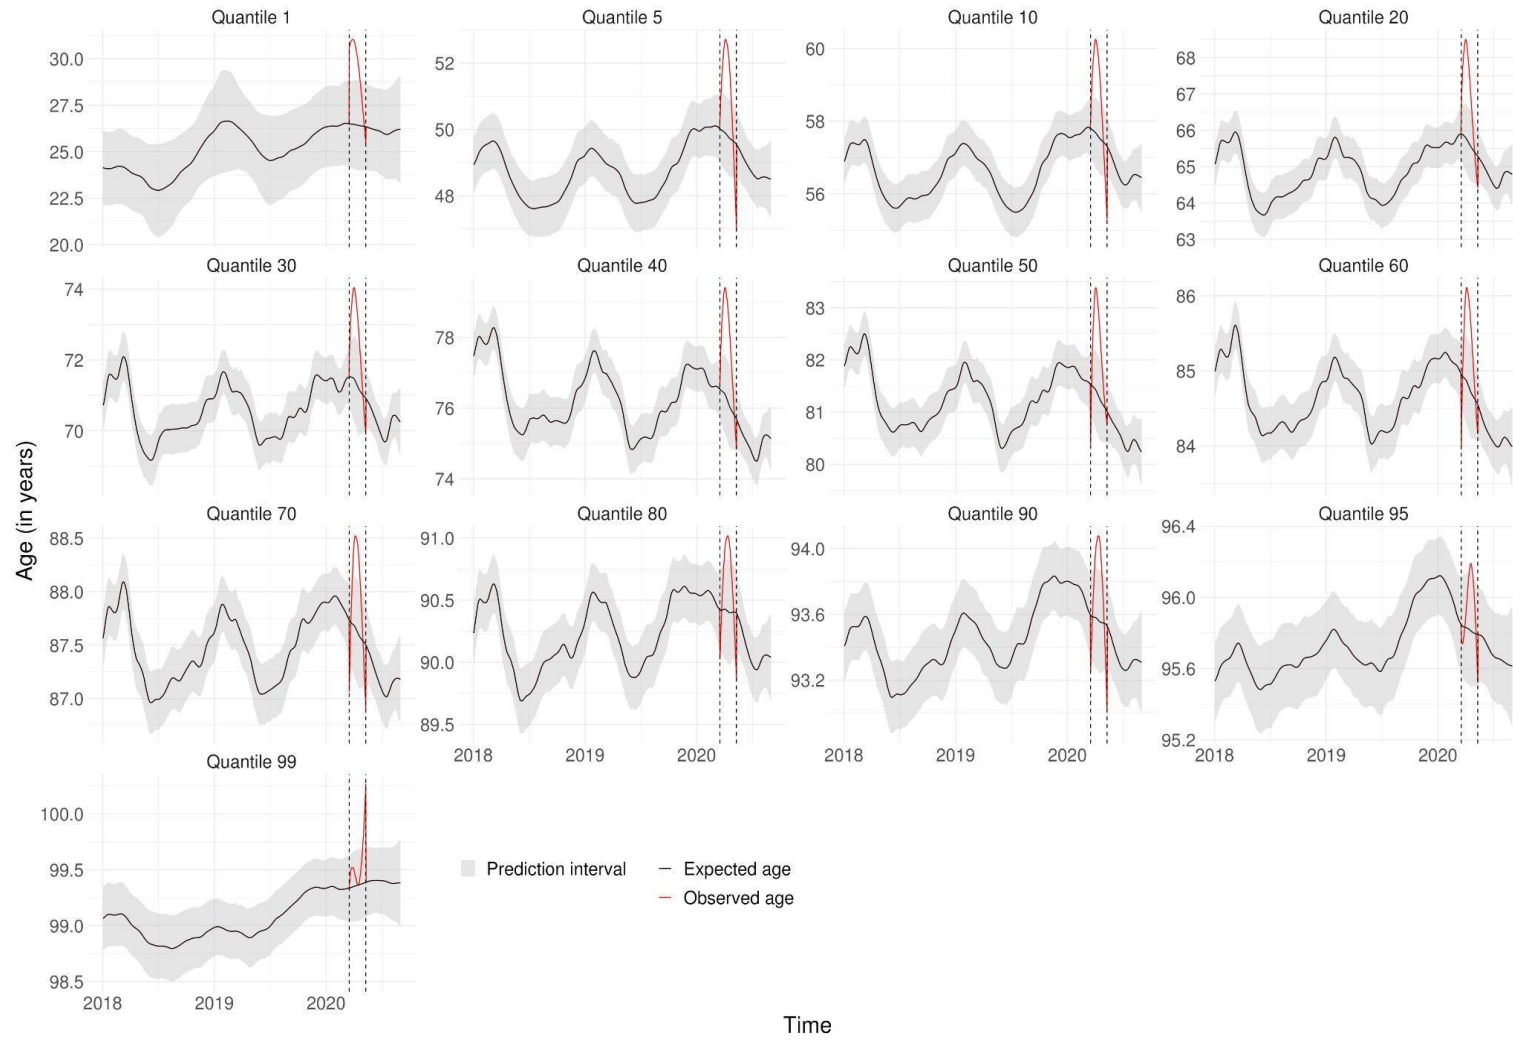

**Supplementary Figure 5** Expected age at death without lockdown and observed age with lockdown for each quantile in Normandie

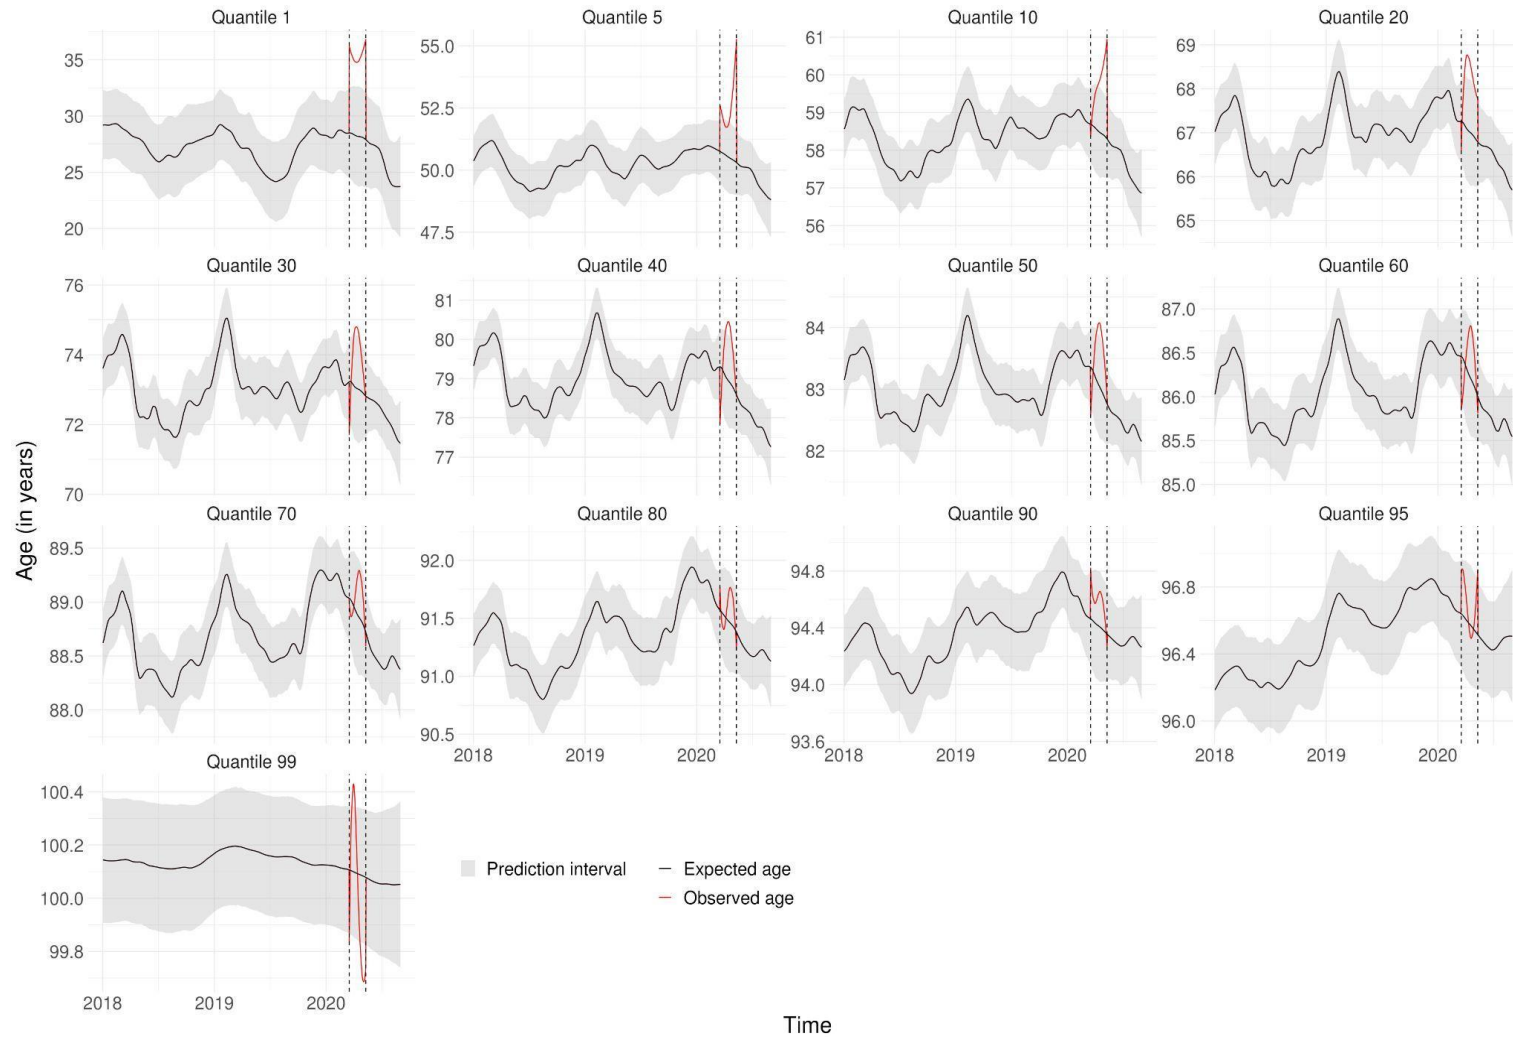

**Supplementary Figure 6** Expected age at death without lockdown and observed age with lockdown for each quantile in Nouvelle Aquitaine

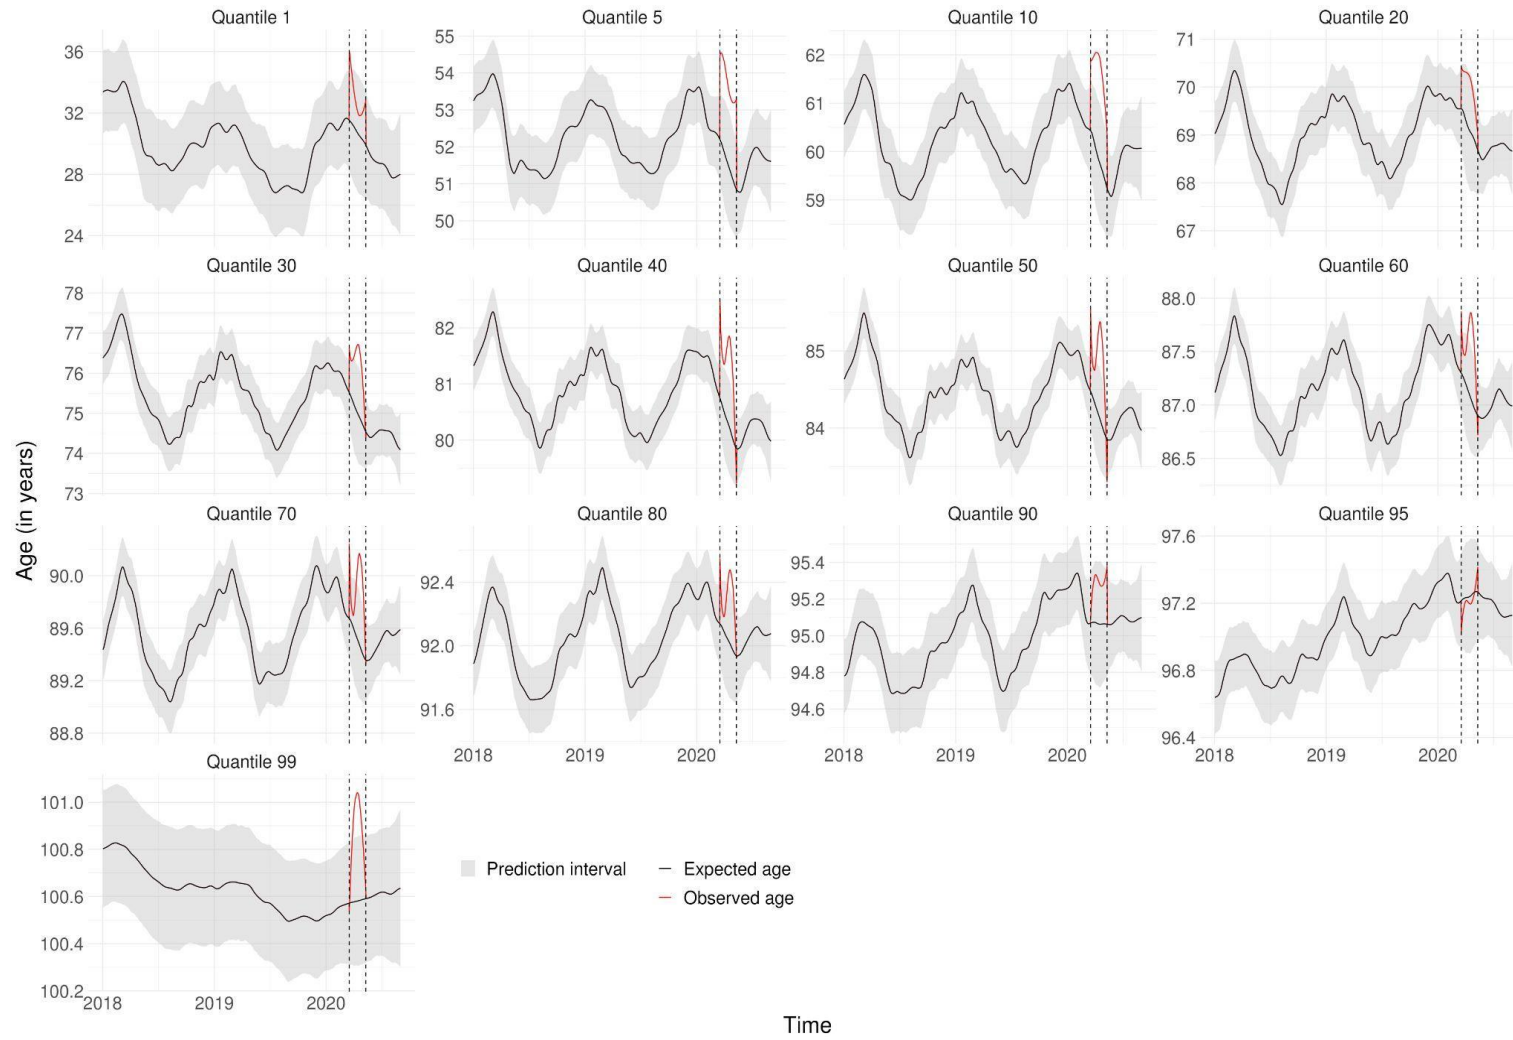

**Supplementary Figure 7** Expected age at death without lockdown and observed age with lockdown for each quantile in Occitanie

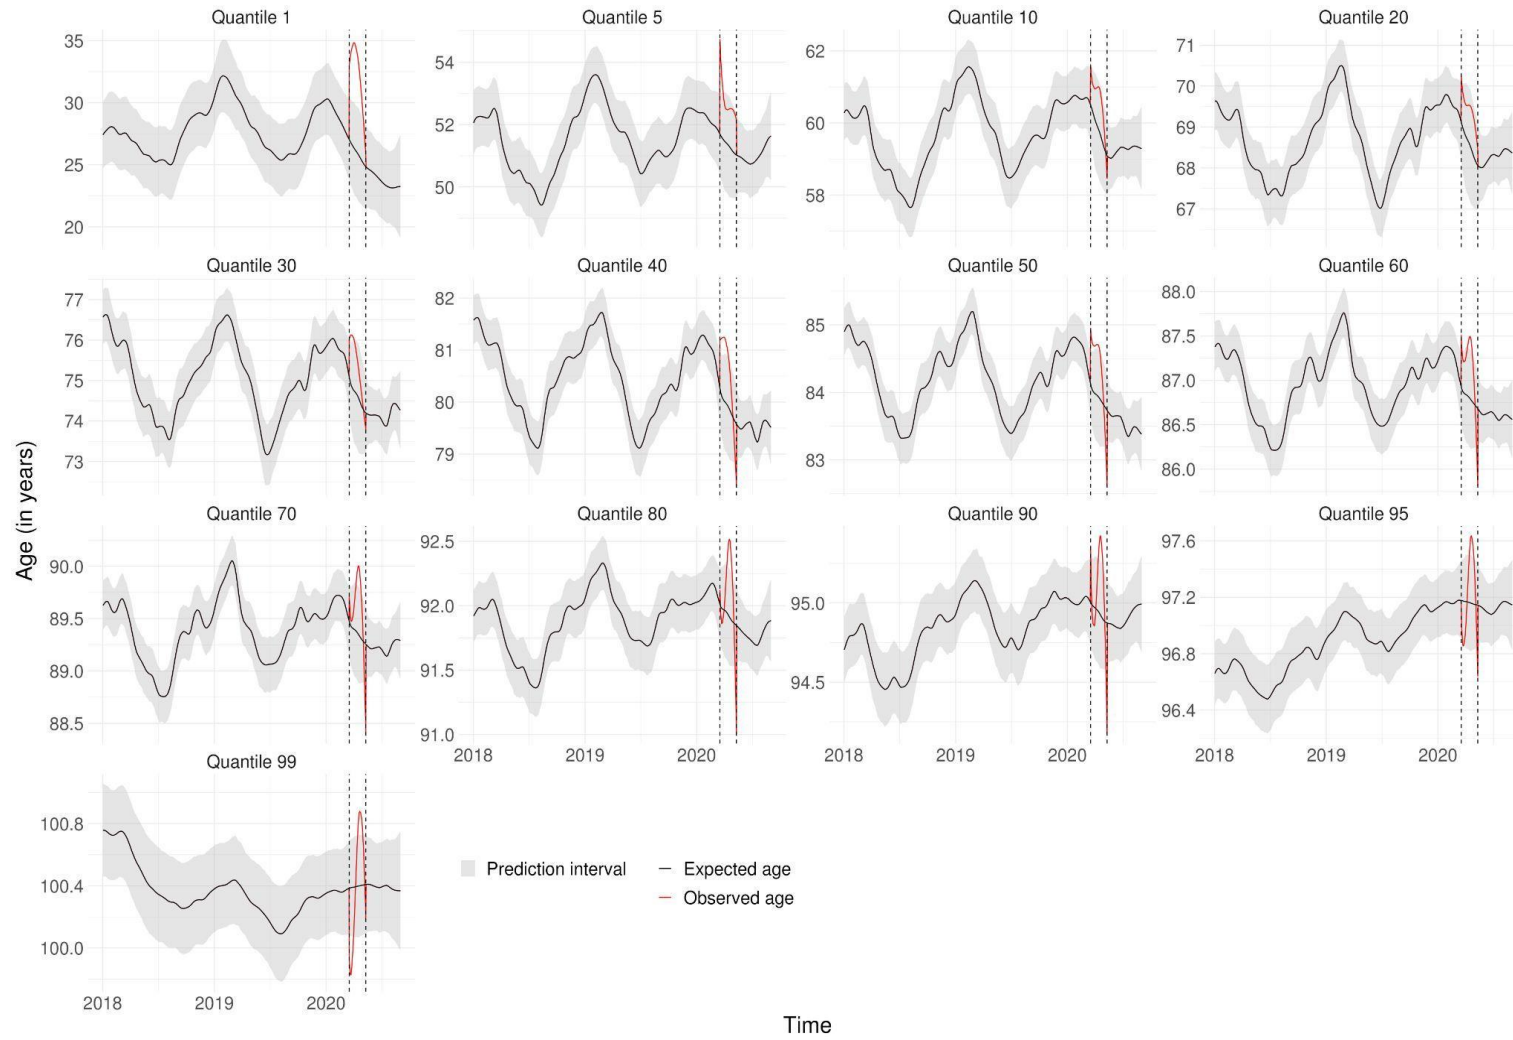

**Supplementary Figure 8** Expected age at death without lockdown and observed age with lockdown for each quantile in Pays de la Loire

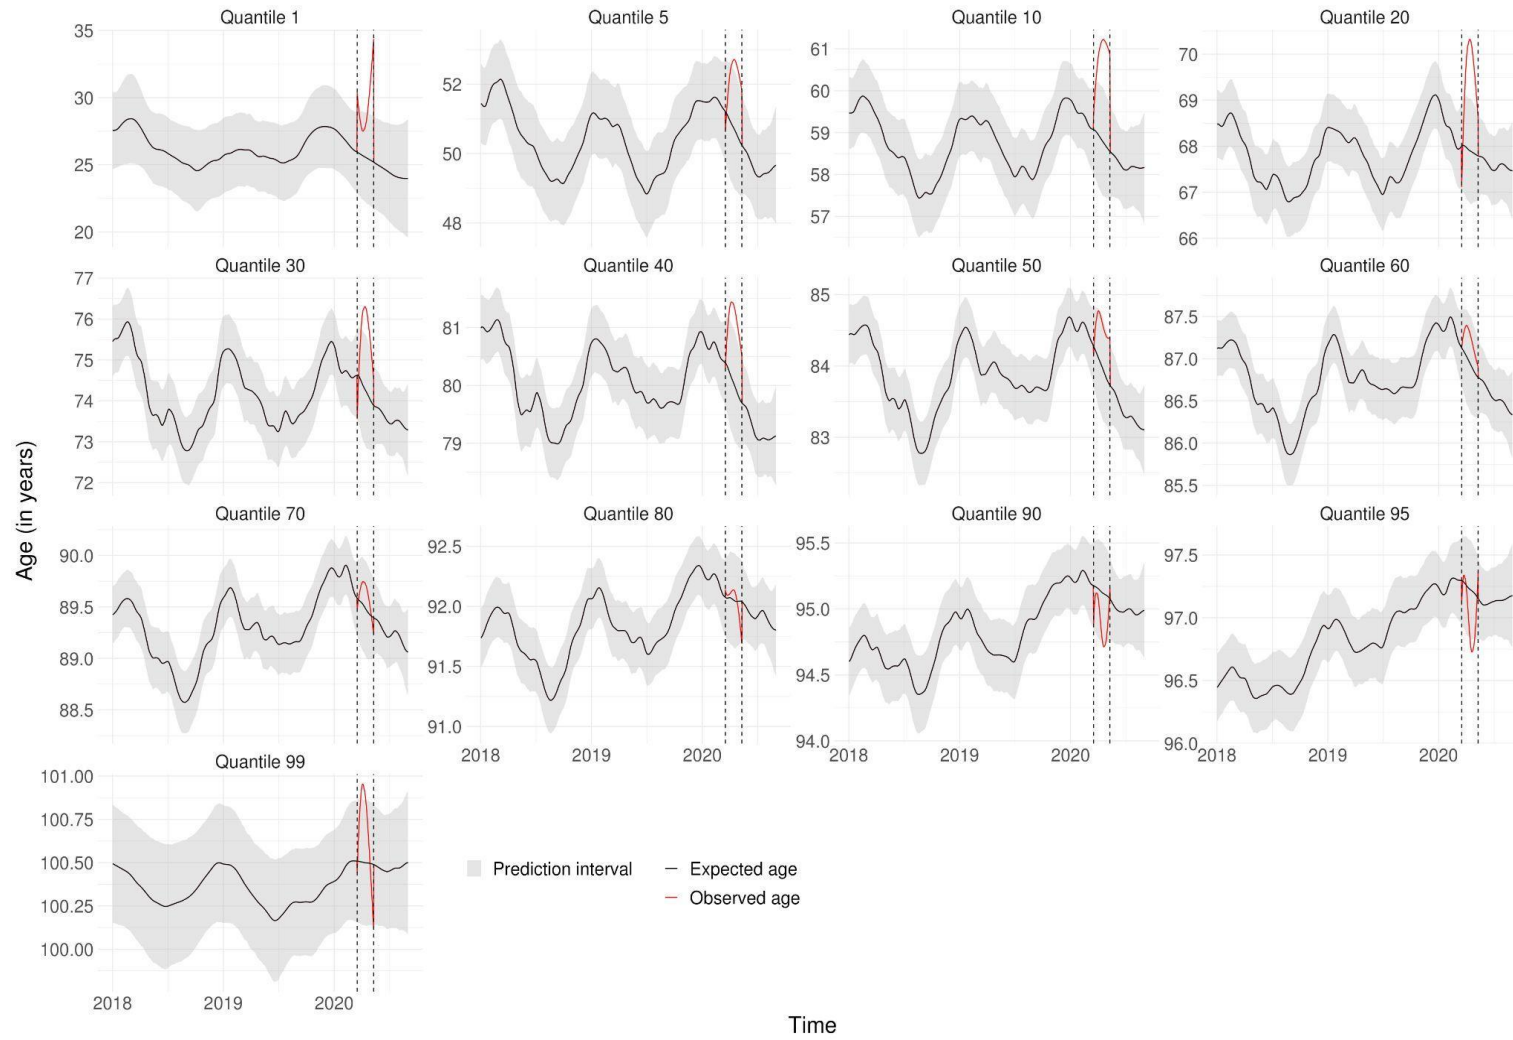

**Supplementary Figure 9** Expected age at death without lockdown and observed age with lockdown for each quantile in Provence-Alpes-Côte d'Azur

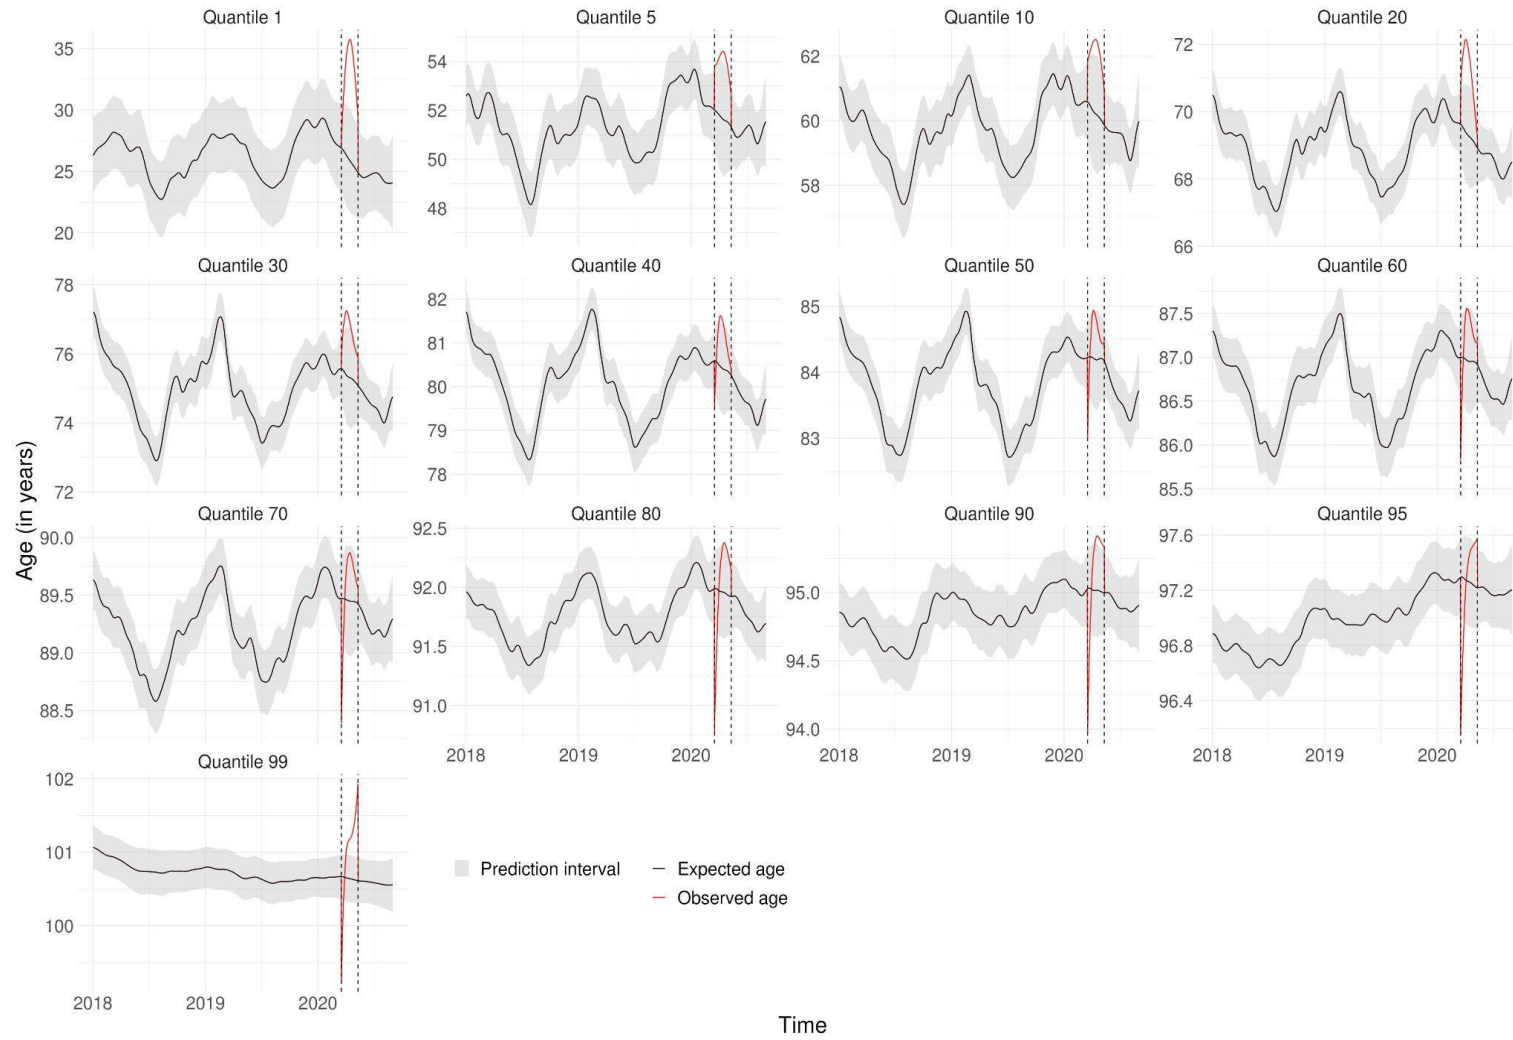



**Supplementary Figure 10** Evolution of the number of deaths according to age at death and sex during the lockdown in 2020 and the corresponding period in 2017-2019 in Auvergne-Rhône-Alpes

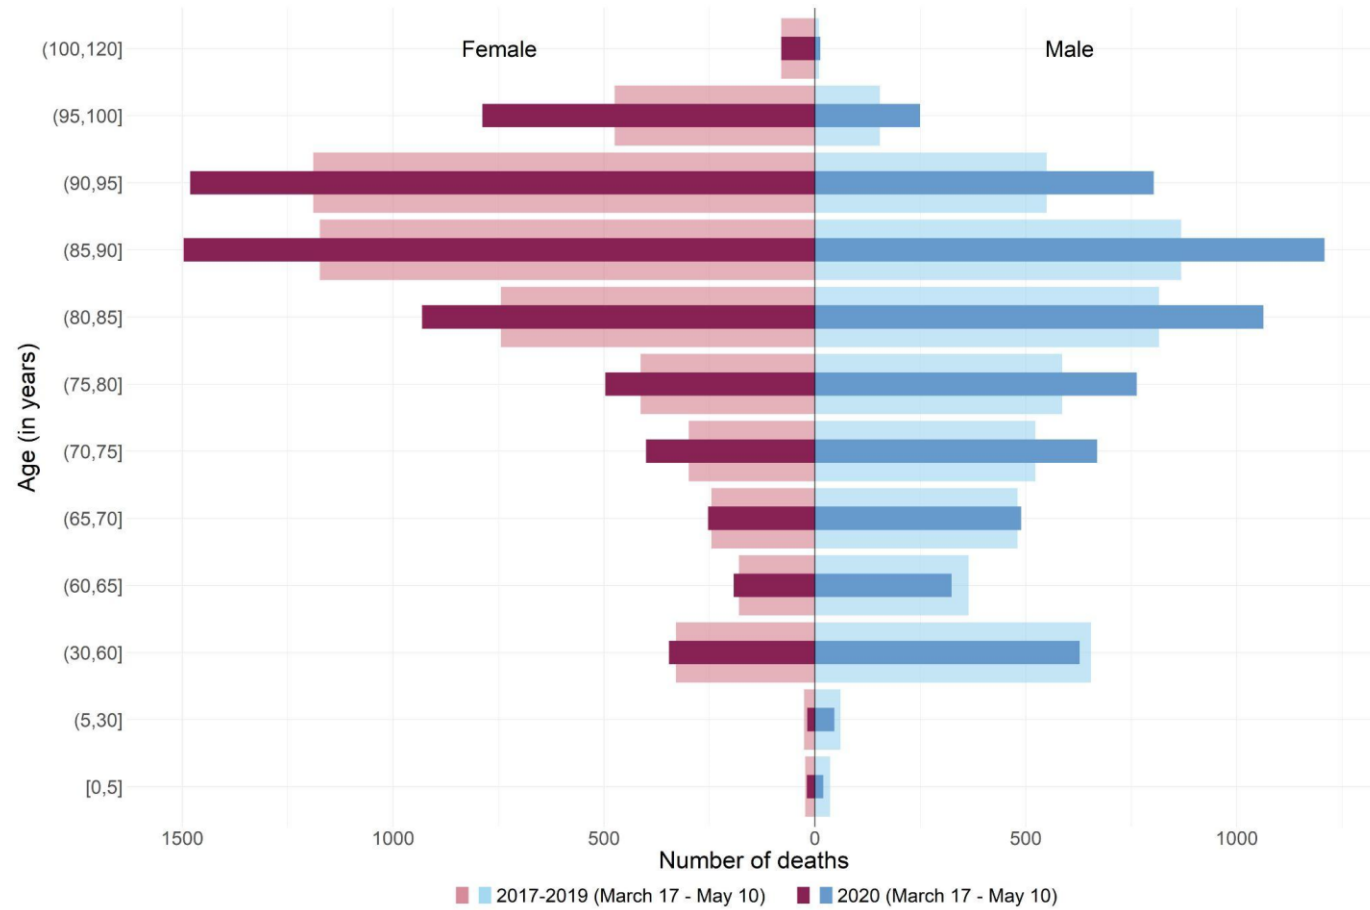

*Dark red and blue stand for 2020 and light red and blue stand for 2017-2019*

**Supplementary Figure 11** Evolution of the number of deaths according to age at death and sex during the lockdown in 2020 and the corresponding period in 2017-2019 in Centre-Val de Loire

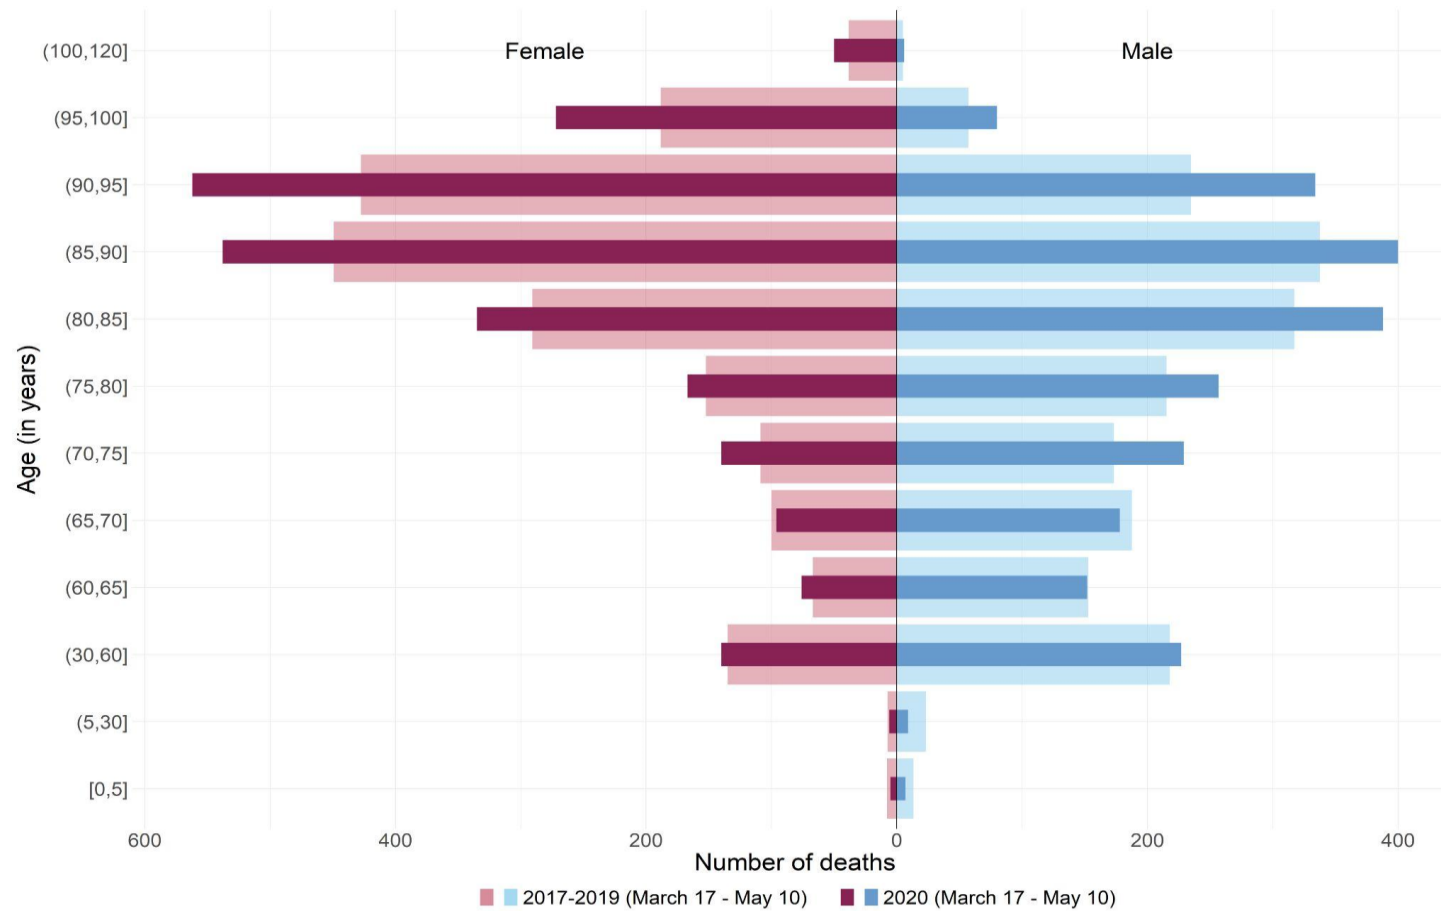

*Dark red and blue stand for 2020 and light red and blue stand for 2017-2019*

**Supplementary Figure 12** Evolution of the number of deaths according to age at death and sex during the lockdown in 2020 and the corresponding period in 2017-2019 in Grand-Est

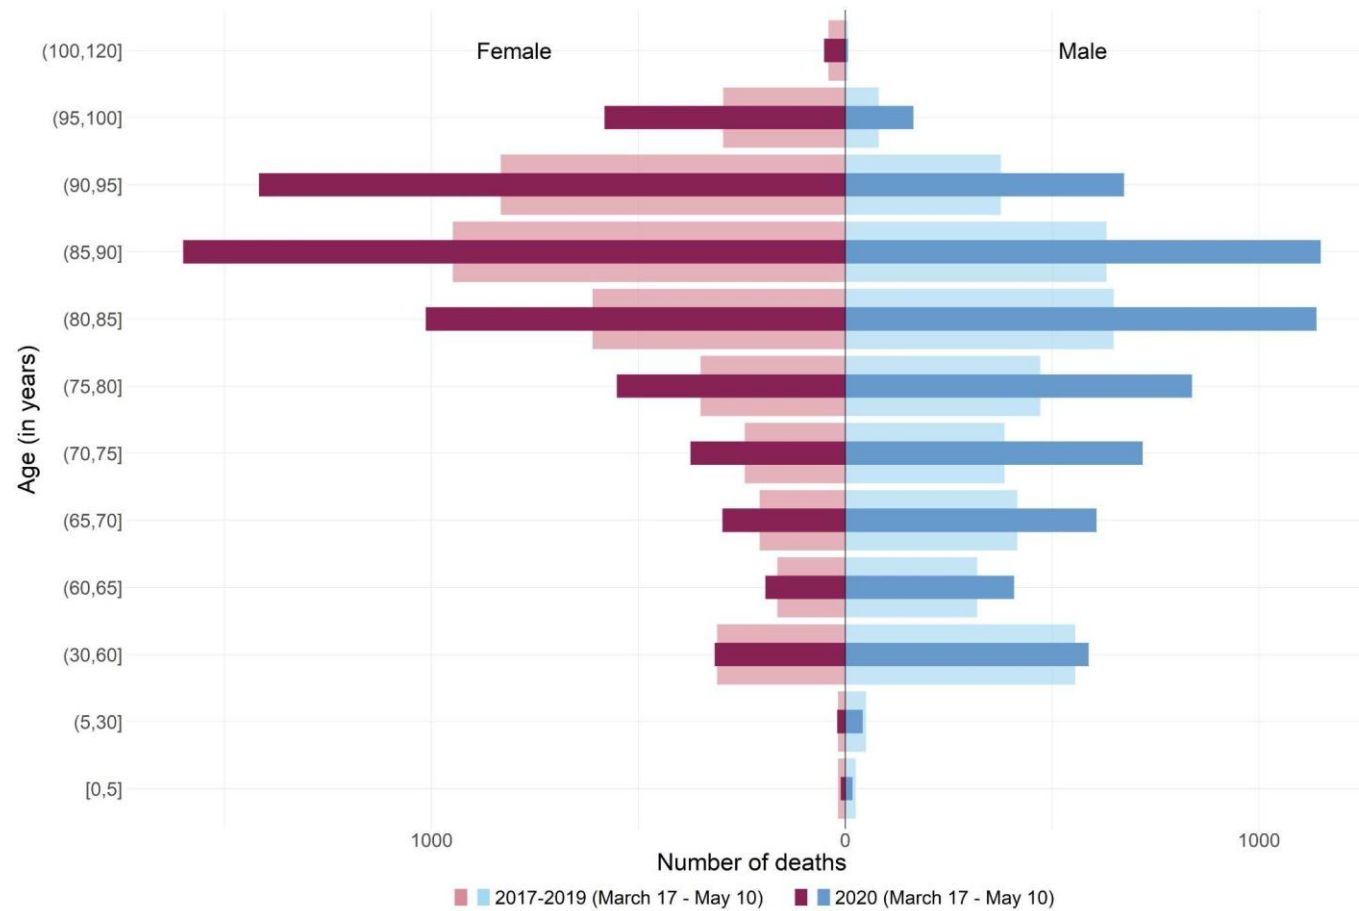

*Dark red and blue stand for 2020 and light red and blue stand for 2017-2019*

**Supplementary Figure 13** Evolution of the number of deaths according to age at death and sex during the lockdown in 2020 and the corresponding period in 2017-2019 in Hauts-de-France

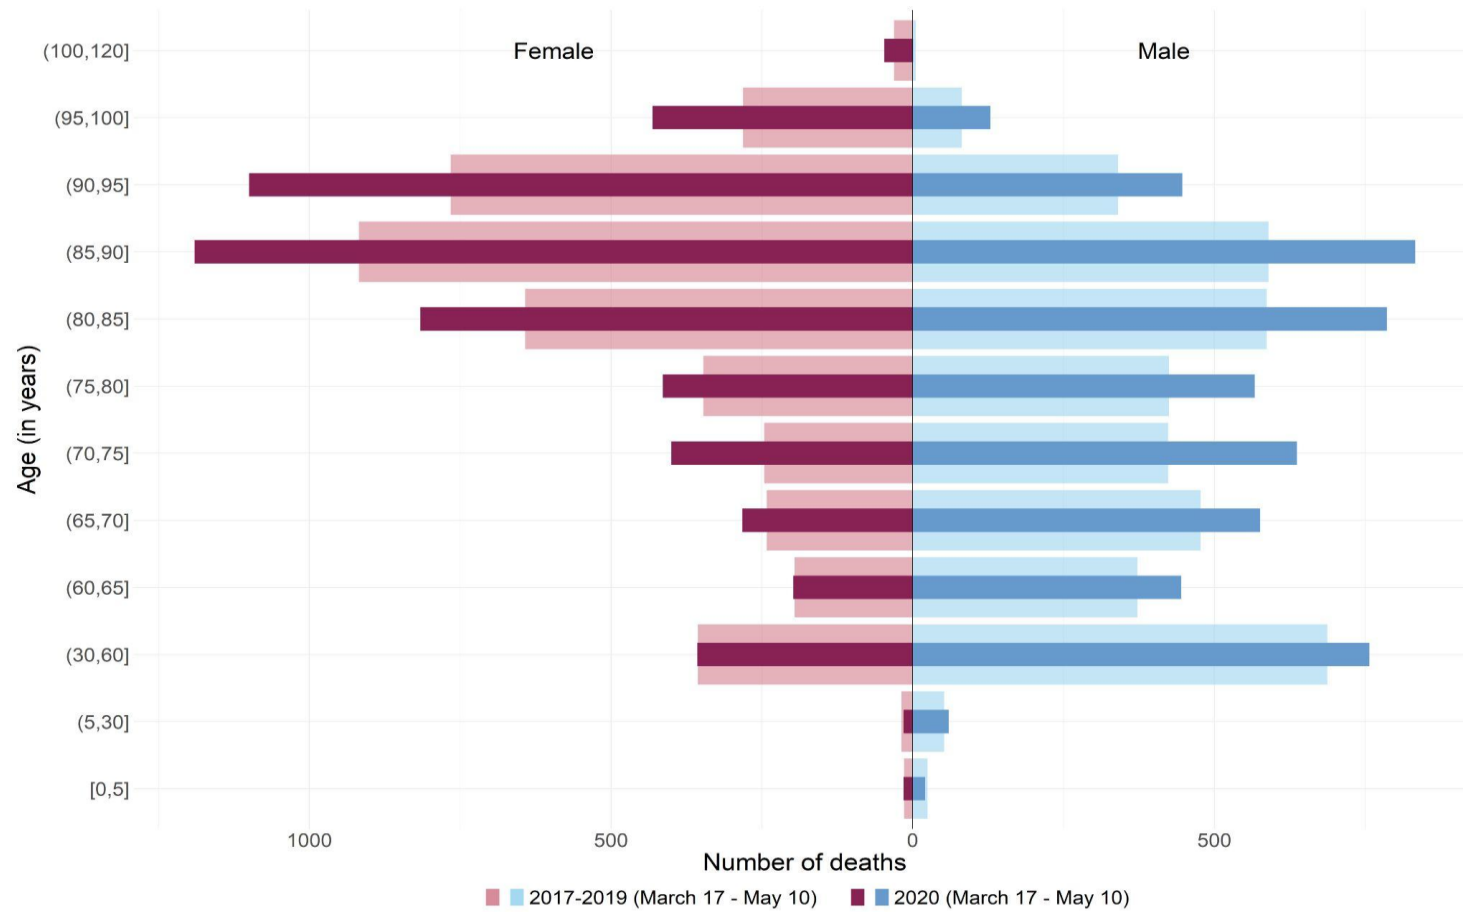

*Dark red and blue stand for 2020 and light red and blue stand for 2017-2019*

**Supplementary Figure 14** Evolution of the number of deaths according to age at death and sex during the lockdown in 2020 and the corresponding period in 2017-2019 in Normandie

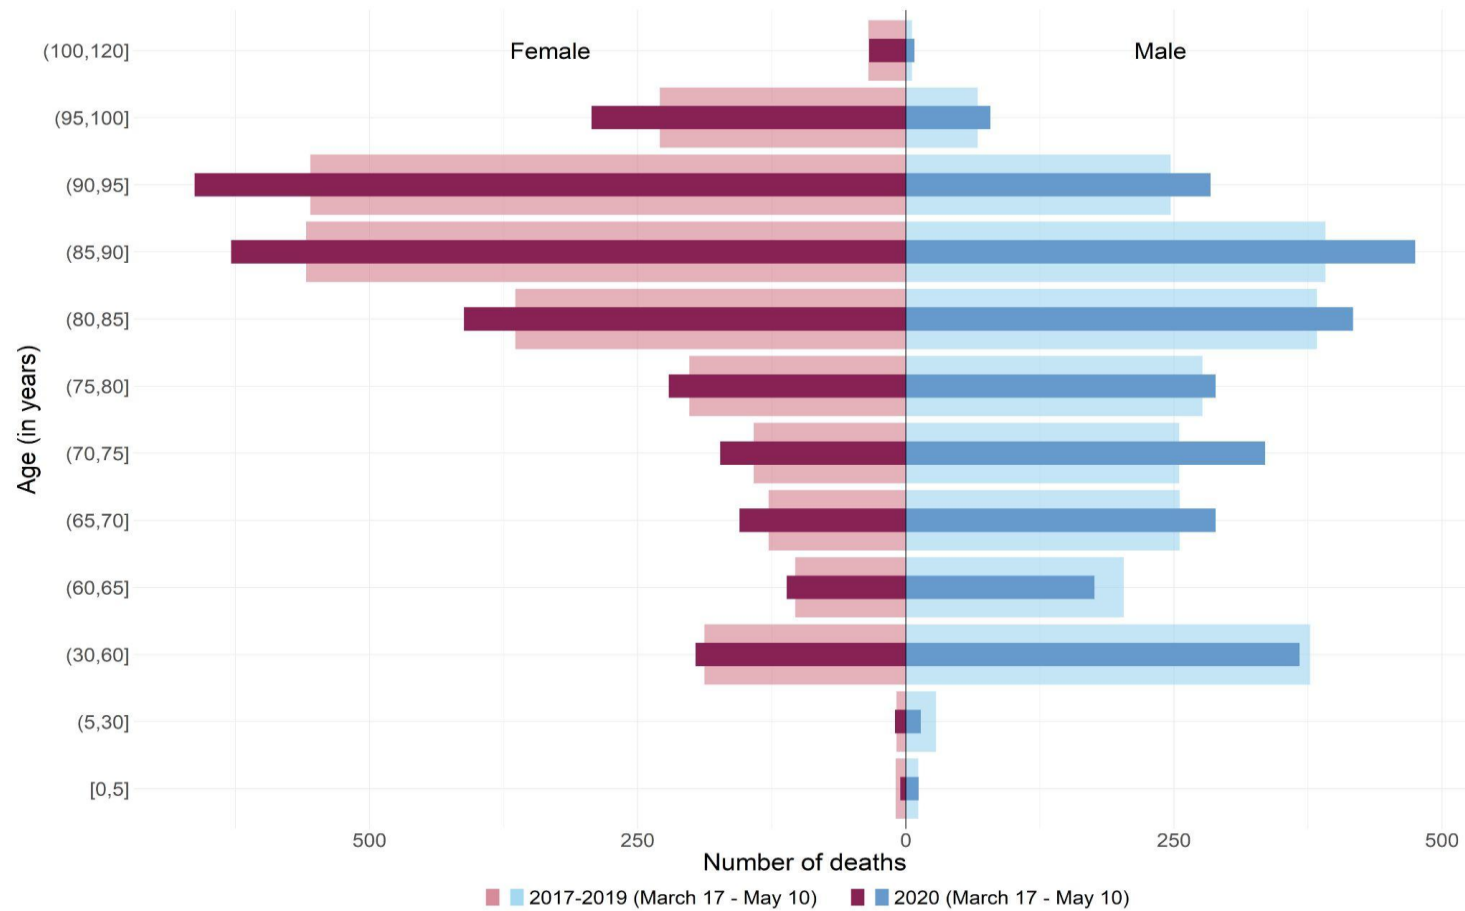

*Dark red and blue stand for 2020 and light red and blue stand for 2017-2019*

**Supplementary Figure 15** Evolution of the number of deaths according to age at death and sex during the lockdown in 2020 and the corresponding period in 2017-2019 in Nouvelle Aquitaine

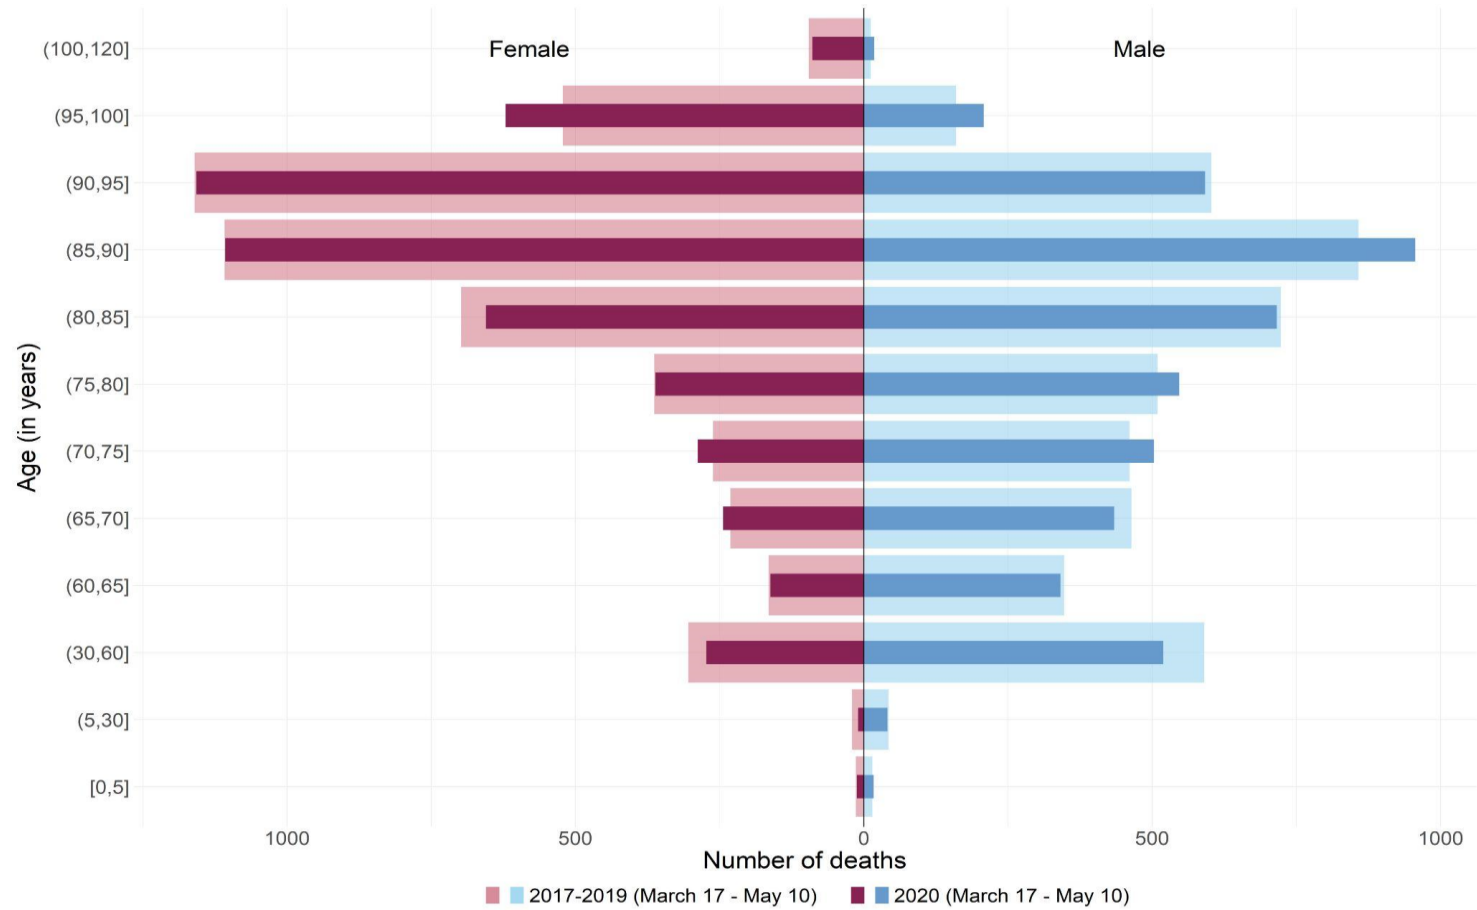

*Dark red and blue stand for 2020 and light red and blue stand for 2017-2019*

**Supplementary Figure 16** Evolution of the number of deaths according to age at death and sex during the lockdown in 2020 and the corresponding period in 2017-2019 in Occitanie

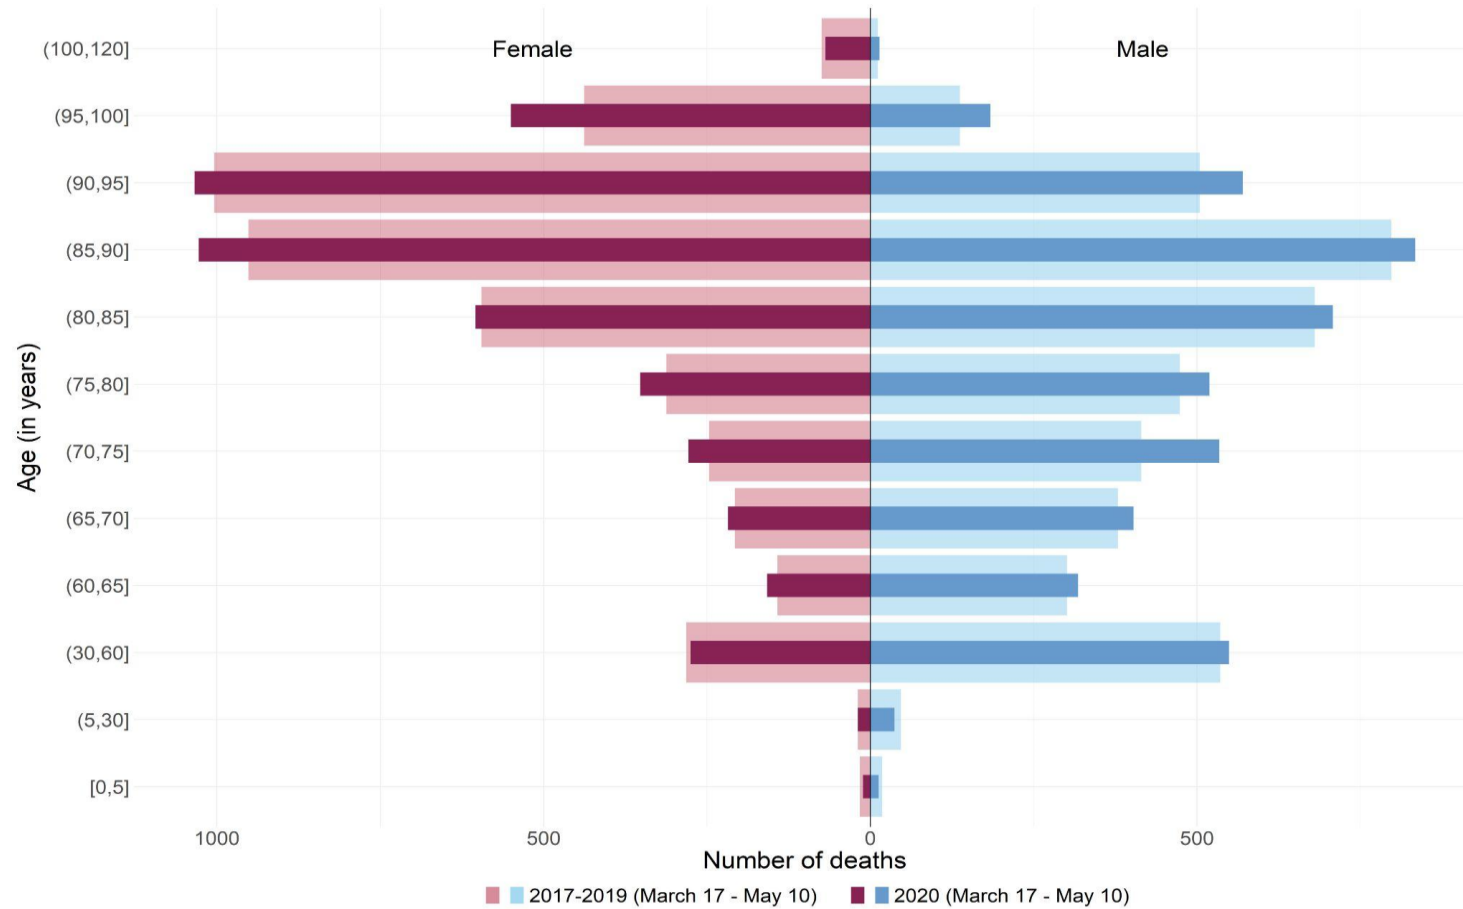

*Dark red and blue stand for 2020 and light red and blue stand for 2017-2019*

**Supplementary Figure 17** Evolution of the number of deaths according to age at death and sex during the lockdown in 2020 and the corresponding period in 2017-2019 in Pays de la Loire

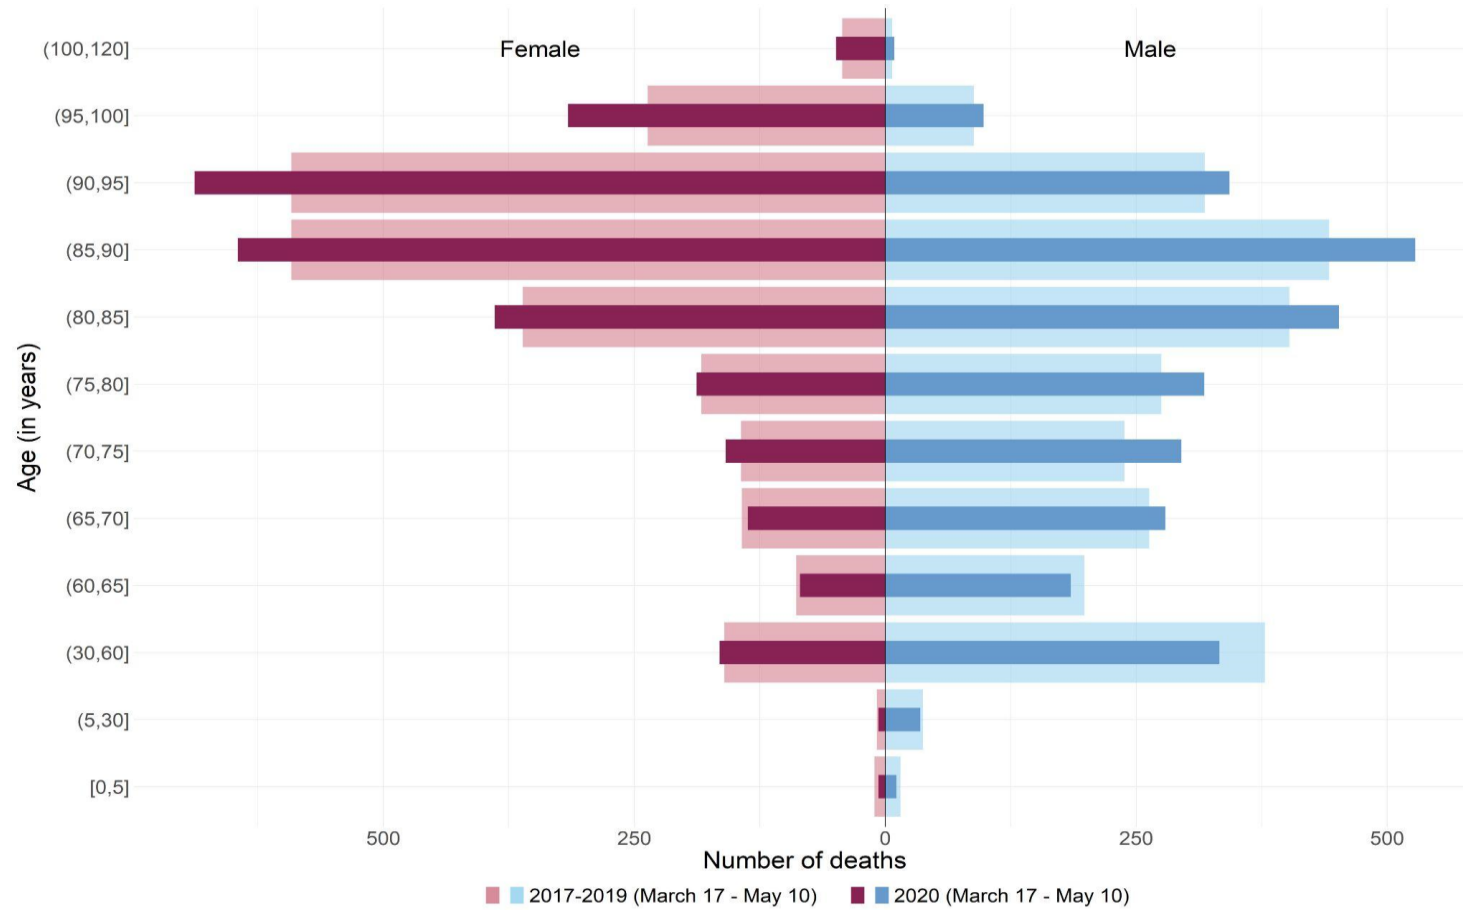

*Dark red and blue stand for 2020 and light red and blue stand for 2017-2019*



**Supplementary Figure 18** Evolution of the number of deaths according to age at death and sex during the lockdown in 2020 and the corresponding period in 2017-2019 in Provence-Alpes-Côte d'Azur

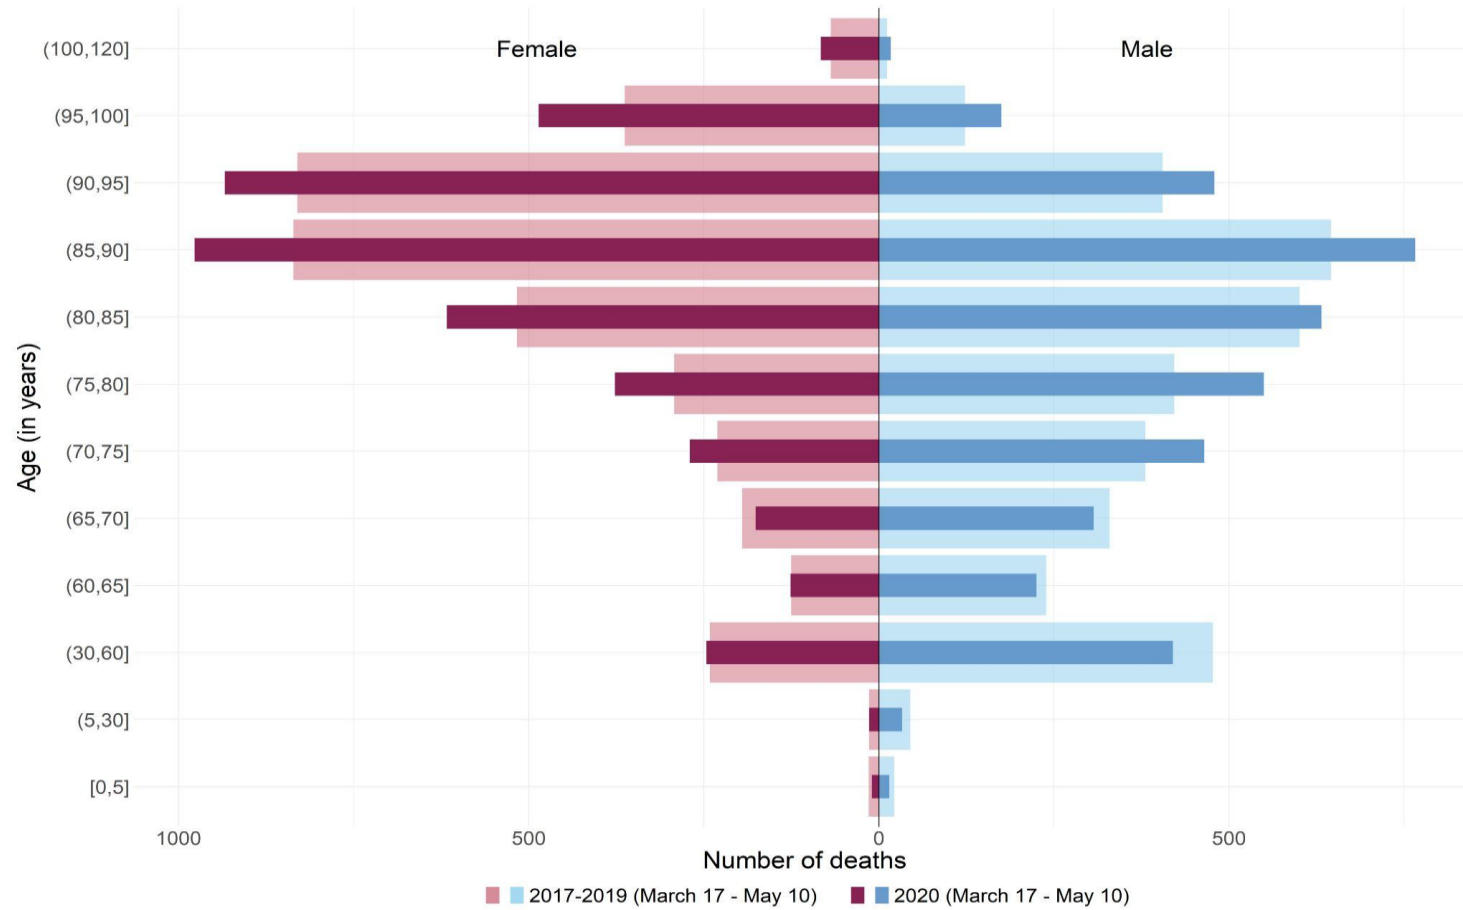

*Dark red and blue stand for 2020 and light red and blue stand for 2017-2019*
